# Supplementary material for: Ultra-long-range interactions between active regulatory elements
Source: Genome Res. 2023 Aug;33(8):1269–83. doi: 10.1101/gr.277567.122 (PMC10547262; doi:10.1101/gr.277567.122)
Supplement: Supplement 3 [file Supplemental_Table_S3.xlsx]

## Sheet: Sheet1
Supplemental table S3
Processed Hi-C datasets used in the study
Filename	Link	Processing	Genome	doi
GSE178982_CTCF-AID_pool.mcool	https://ftp.ncbi.nlm.nih.gov/geo/series/GSE178nnn/GSE178982/suppl/GSE178982_CTCF-AID_pool.mcool		mm10	https://doi.org/10.1101/2021.07.14.452365
GSE178982_CTCF-UT_pool.mcool	https://ftp.ncbi.nlm.nih.gov/geo/series/GSE178nnn/GSE178982/suppl/GSE178982_CTCF-UT_pool.mcool		mm10	https://doi.org/10.1101/2021.07.14.452365
GSE178982_RAD21-AID_pool.mcool	https://ftp.ncbi.nlm.nih.gov/geo/series/GSE178nnn/GSE178982/suppl/GSE178982_RAD21-AID_pool.mcool		mm10	https://doi.org/10.1101/2021.07.14.452365
GSE178982_RAD21-UT_pool.mcool	https://ftp.ncbi.nlm.nih.gov/geo/series/GSE178nnn/GSE178982/suppl/GSE178982_RAD21-UT_pool.mcool		mm10	https://doi.org/10.1101/2021.07.14.452365
GSE178982_WAPL-AID_pool.mcool	https://ftp.ncbi.nlm.nih.gov/geo/series/GSE178nnn/GSE178982/suppl/GSE178982_WAPL-AID_pool.mcool		mm10	https://doi.org/10.1101/2021.07.14.452365
GSE178982_WAPL-UT_pool.mcool	https://ftp.ncbi.nlm.nih.gov/geo/series/GSE178nnn/GSE178982/suppl/GSE178982_WAPL-UT_pool.mcool		mm10	https://doi.org/10.1101/2021.07.14.452365
GSE178982_YY1-AID_pool.mcool	https://ftp.ncbi.nlm.nih.gov/geo/series/GSE178nnn/GSE178982/suppl/GSE178982_YY1-AID_pool.mcool		mm10	https://doi.org/10.1101/2021.07.14.452365
GSE178982_YY1-UT_pool.mcool	https://ftp.ncbi.nlm.nih.gov/geo/series/GSE178nnn/GSE178982/suppl/GSE178982_YY1-UT_pool.mcool		mm10	https://doi.org/10.1101/2021.07.14.452365
GSE132898_hic.hybrid.merged.flagged.Q30.rmdup.txt.gz	https://ftp.ncbi.nlm.nih.gov/geo/series/GSE132nnn/GSE132898/suppl/GSE132898_hic.hybrid.merged.flagged.Q30.rmdup.txt.gz	Interaction pairs were split by genotype (G1/G2) and counts derived using pandas. Counts were converted using cooler cload pairs	mm10	10.1101/gr.257568.119
G1_cells.1000.cool_mm9.mcool	These files were kindly shared by Aleksandra Galitsyna		mm9	doi:10.1038/nature23001
early-S_cells.1000.cool_mm9.mcool	These files were kindly shared by Aleksandra Galitsyna		mm9	doi:10.1038/nature23001
late-S-G2_cells.1000.cool_mm9.mcool	These files were kindly shared by Aleksandra Galitsyna		mm9	doi:10.1038/nature23001
GSE95014_DKO_3.3.validPairs.txt.gz	https://ftp.ncbi.nlm.nih.gov/geo/series/GSE95nnn/GSE95014/suppl/GSE95014_DKO_3.3.validPairs.txt.gz	cooler cload pairs	hg19	10.1016/j.cell.2017.04.013
GSE95014_Hap1.validPairs.txt.gz	https://ftp.ncbi.nlm.nih.gov/geo/series/GSE95nnn/GSE95014/suppl/GSE95014_Hap1.validPairs.txt.gz	cooler cload pairs	hg19	10.1016/j.cell.2017.04.013
GSE95014_SCC4KO.validPairs.txt.gz	https://ftp.ncbi.nlm.nih.gov/geo/series/GSE95nnn/GSE95014/suppl/GSE95014_SCC4KO.validPairs.txt.gz	cooler cload pairs	hg19	10.1016/j.cell.2017.04.013
GSE95014_WaplKO_1.14.validPairs.txt.gz	https://ftp.ncbi.nlm.nih.gov/geo/series/GSE95nnn/GSE95014/suppl/GSE95014_WaplKO_1.14.validPairs.txt.gz	cooler cload pairs	hg19	10.1016/j.cell.2017.04.013
GSE95014_WaplKO_3.3.validPairs.txt.gz	https://ftp.ncbi.nlm.nih.gov/geo/series/GSE95nnn/GSE95014/suppl/GSE95014_WaplKO_3.3.validPairs.txt.gz	cooler cload pairs	hg19	10.1016/j.cell.2017.04.013
4DNFIC21MG3U_mESC_G1_OCT4GFP.mcool	https://data.4dnucleome.org/files-processed/4DNFIC21MG3U/		mm10	https://doi.org/10.1016/j.cell.2017.09.043
4DNFIKK3QG34_NPC_G1_SOX1GFP.mcool	https://data.4dnucleome.org/files-processed/4DNFIKK3QG34/		mm10	https://doi.org/10.1016/j.cell.2017.09.043
GSM4662081_YueLab-HiC-Brain_merged.hic	https://ftp.ncbi.nlm.nih.gov/geo/samples/GSM4662nnn/GSM4662081/suppl/GSM4662081_YueLab-HiC-Brain_merged.hic	hic2cool convert	zv10	https://doi.org/10.1038/s41586-020-2962-9
GSM4662083_YueLab-HiC-Muscle_merged.hic	ftp://ftp.ncbi.nlm.nih.gov/geo/samples/GSM4662nnn/GSM4662083/suppl/GSM4662083_YueLab-HiC-Muscle_merged.hic	hic2cool convert	zv10	https://doi.org/10.1038/s41586-020-2962-9
ED.allValidPairs.hic	https://ftp.ncbi.nlm.nih.gov/geo/samples/GSM3619nnn/GSM3619416/suppl/GSM3619416_processed_data_files.tar.gz	hic2cool convert	dm6	10.1126/sciadv.aax4001
GSM3780957_Ctrl_rep1_sort_200M_allValidPairs.hic, GSM3780958_Ctrl_rep2_sort_200M_allValidPairs.hic	ftp://ftp.ncbi.nlm.nih.gov/geo/series/GSE131nnn/GSE131463/suppl/GSE131463_RAW.tar	hic2cool convert followed by cooler merge	mm9	https://doi.org/10.1186/s13072-019-0289-2
GSM3780959_Sr_rep1_sort_200M_allValidPairs.hic, GSM3780960_Sr_rep2_sort_200M_allValidPairs.hic	ftp://ftp.ncbi.nlm.nih.gov/geo/series/GSE131nnn/GSE131463/suppl/GSE131463_RAW.tar	hic2cool convert followed by cooler merge	mm9	https://doi.org/10.1186/s13072-019-0289-2
GSE121355_ch12_wt_Hic_APR60h_inter.hic	https://ftp.ncbi.nlm.nih.gov/geo/series/GSE121nnn/GSE121355/suppl/GSE121355_ch12_wt_Hic_APR60h_inter.hic		mm9	https://doi.org/10.1016/j.cell.2019.07.011
GSE121355_ch12_Med14Nsmash_Hic_APR60h_inter.hic	https://ftp.ncbi.nlm.nih.gov/geo/series/GSE121nnn/GSE121355/suppl/GSE121355_ch12_Med14Nsmash_Hic_APR60h_inter.hic		mm9	https://doi.org/10.1016/j.cell.2019.07.011
GSE121355_ch12_Tailless_Hic_inter.hic	https://ftp.ncbi.nlm.nih.gov/geo/series/GSE121nnn/GSE121355/suppl/GSE121355_ch12_Tailless_Hic_inter.hic		mm9	https://doi.org/10.1016/j.cell.2019.07.011
Reed et al. 2022 THP-1 0h	https://ftp.ncbi.nlm.nih.gov/geo/series/GSE201nnn/GSE201353/suppl/GSE201353_LIMA_THP1_WT_LPIF_0000_S_0.0.0_megaMap_inter.hic	hic2cool convert	hg38	https://doi.org/10.1101/2022.05.05.490836
Reed et al. 2022 THP-1 0.5h	https://ftp.ncbi.nlm.nih.gov/geo/series/GSE201nnn/GSE201353/suppl/GSE201353_LIMA_THP1_WT_LPIF_0030_S_0.0.0_megaMap_inter.hic	hic2cool convert	hg38	https://doi.org/10.1101/2022.05.05.490836
Reed et al. 2022 THP-1 1h	https://ftp.ncbi.nlm.nih.gov/geo/series/GSE201nnn/GSE201353/suppl/GSE201353_LIMA_THP1_WT_LPIF_0060_S_0.0.0_megaMap_inter.hic	hic2cool convert	hg38	https://doi.org/10.1101/2022.05.05.490836
Reed et al. 2022 THP-1 1.5h	https://ftp.ncbi.nlm.nih.gov/geo/series/GSE201nnn/GSE201353/suppl/GSE201353_LIMA_THP1_WT_LPIF_0090_S_0.0.0_megaMap_inter.hic	hic2cool convert	hg38	https://doi.org/10.1101/2022.05.05.490836
Reed et al. 2022 THP-1 2h	https://ftp.ncbi.nlm.nih.gov/geo/series/GSE201nnn/GSE201353/suppl/GSE201353_LIMA_THP1_WT_LPIF_0120_S_0.0.0_megaMap_inter.hic	hic2cool convert	hg38	https://doi.org/10.1101/2022.05.05.490836
Reed et al. 2022 THP-1 4h	https://ftp.ncbi.nlm.nih.gov/geo/series/GSE201nnn/GSE201353/suppl/GSE201353_LIMA_THP1_WT_LPIF_0240_S_0.0.0_megaMap_inter.hic	hic2cool convert	hg38	https://doi.org/10.1101/2022.05.05.490836
Reed et al. 2022 THP-1 6h	https://ftp.ncbi.nlm.nih.gov/geo/series/GSE201nnn/GSE201353/suppl/GSE201353_LIMA_THP1_WT_LPIF_0360_S_0.0.0_megaMap_inter.hic	hic2cool convert	hg38	https://doi.org/10.1101/2022.05.05.490836
Reed et al. 2022 THP-1 24h	https://ftp.ncbi.nlm.nih.gov/geo/series/GSE201nnn/GSE201353/suppl/GSE201353_LIMA_THP1_WT_LPIF_1440_S_0.0.0_megaMap_inter.hic	hic2cool convert	hg38	https://doi.org/10.1101/2022.05.05.490836
