# Supplementary material for: Ultra-long-range interactions between active regulatory elements
Source: Genome Res. 2023 Aug;33(8):1269–83. doi: 10.1101/gr.277567.122 (PMC10547262; doi:10.1101/gr.277567.122)
Supplement: Supplement 4 [file Supplemental_Table_S4.xlsx]

## Sheet: Sheet1
Supplemental table S4
Raw Hi-C datasets used in the study
Name	Genome	Input SRA	doi
Hsieh et al. 2020 mESC WT micro-C	mm10	SRR8954855,SRR8954854,SRR8954853,SRR8954852,SRR8954844,SRR8954845,SRR8954846,SRR8954847,SRR8954849,SRR8954850,SRR8954851,SRR8954848,SRR8954836,SRR8954837,SRR8954838,SRR8954839,SRR8954840,SRR8954841,SRR8954842,SRR8954843,SRR8954828,SRR8954829,SRR8954830,SRR8954831,SRR8954832,SRR8954833,SRR8954834,SRR8954835,SRR8954827,SRR8954823,SRR8954822,SRR8954821,SRR8954819,SRR8954820,SRR8954826,SRR8954825,SRR…	https://doi.org/10.1016/j.molcel.2020.03.002
Hsieh et al. 2020 mESC TRP micro-C	mm10	SRR10480692,SRR10480693,SRR8954859	https://doi.org/10.1016/j.molcel.2020.03.002
Hsieh et al. 2020 mESC FLP micro-C	mm10	SRR8954860,SRR10480694,SRR10480695	https://doi.org/10.1016/j.molcel.2020.03.002
Zhang et al. 2019 prometaphase Hi-C	mm10	SRR8925358,SRR8925359,SRR8925360,SRR8925361,SRR8925362,SRR8925363,SRR8925364	https://doi.org/10.1038/s41586-019-1778-y
Zhang et al. 2019 ana/telophase Hi-C	mm10	SRR8925365,SRR8925366,SRR8925367,SRR8925368,SRR8925369,SRR8925370,SRR8925371	https://doi.org/10.1038/s41586-019-1778-y
Zhang et al. 2019 early G1 Hi-C	mm10	SRR8925372,SRR8925373,SRR8925374,SRR8925375,SRR8925376,SRR8925377,SRR8925378	https://doi.org/10.1038/s41586-019-1778-y
Zhang et al. 2019 mid G1 Hi-C	mm10	SRR8925379,SRR8925380,SRR8925381,SRR8925382,SRR8925383,SRR8925384,SRR8925385	https://doi.org/10.1038/s41586-019-1778-y
Zhang et al. 2019 late G1 Hi-C	mm10	SRR8925386,SRR8925387,SRR8925388,SRR8925389,SRR8925390,SRR8925391,SRR8925392	https://doi.org/10.1038/s41586-019-1778-y
Seitan et al. 2013 WT	mm10	SRR931728,SRR931729,SRR931730,SRR931731,SRR931732,SRR931733,SRR931734	10.1101/gr.161620.113
Seitan et al. 2013 Rad21 KO	mm10	SRR931721,SRR931722,SRR931723,SRR931725,SRR931726,SRR931727	10.1101/gr.161620.113
Jiang et al. 2020 Pol2 Untreated	mm10	SRR11122703,SRR11122702	https://doi.org/10.1186/s13059-020-02067-3
Jiang et al. 2020 Pol2 6h IAA	mm10	SRR11122699,SRR11122698	https://doi.org/10.1186/s13059-020-02067-3
Jiang et al. 2020 Pol2 mitotic exit Untreated	mm10	SRR12030785,SRR12030784	https://doi.org/10.1186/s13059-020-02067-3
Jiang et al. 2020 Pol2 mitotic exit 6h IAA	mm10	SRR12030783,SRR12030782	https://doi.org/10.1186/s13059-020-02067-3
Linares-Saldana et al. 2021 dTAG-BRD4 DMSO	mm10	SRR14061950,SRR14061951	https://doi.org/10.1038/s41588-021-00934-8
Linares-Saldana et al. 2021 dTAG-BRD4 Degron	mm10	SRR14061952,SRR14061953	https://doi.org/10.1038/s41588-021-00934-8
Pelham-Webb et al. 2021 Asynchronous DMSO	mm10	SRR13369943,SRR13369944	https://doi.org/10.1016/j.molcel.2021.02.032
Pelham-Webb et al. 2021 Asynchronous p300i	mm10	SRR13369945,SRR13369946	https://doi.org/10.1016/j.molcel.2021.02.032
Boyle et al. 2020 WT	mm10	SRR9831563,SRR9831564,SRR9831565,SRR9831566,SRR9831567,SRR9831568,SRR9831569,SRR9831570,SRR9831571,SRR9831572	doi:10.1101/gad.336487.120
Boyle et al. 2020 Ring1b KO	mm10	SRR9831577,SRR9831578,SRR9831579,SRR9831580	doi:10.1101/gad.336487.120
Rhodes et al. 2020 Tir1-Aux	mm10	ERR3252823,ERR3252824,ERR3252825,ERR3252826,ERR3252827,ERR3252828,ERR3252829,ERR3252830	https://doi.org/10.1016/j.celrep.2019.12.057
Rhodes et al. 2020 Scc1-Aux	mm10	ERR3252815,ERR3252816,ERR3252817,ERR3252818,ERR3252819,ERR3252820,ERR3252821,ERR3252822	https://doi.org/10.1016/j.celrep.2019.12.057
Rao et al. 2014 GM2878 WT	hg38	https://www.ncbi.nlm.nih.gov/Traces/study/?acc=SRP050102	http://dx.doi.org/10.1016/j.cell.2014.11.021
