# Supplementary material for: Ultra-long-range interactions between active regulatory elements
Source: Genome Res. 2023 Aug;33(8):1269–83. doi: 10.1101/gr.277567.122 (PMC10547262; doi:10.1101/gr.277567.122)
Supplement: Supplement 5 [file Supplemental_Table_S5.xlsx]

## Sheet: Sheet1
Supplemental table S5
CistromeDB/ReMap2022 datasets discarded in the contact screen
Discarded cistromeDB datasets mESCs	Discarded cistromeDB datasets GM12878	Discarded ReMap2022 datasets GM12878
Misannotated	Misannotated	Revoked from ENCODE
8980	45221	ENCSR679FAB_RNF2
32902		ENCSR744XTG_SUZ12
37751		ENCSR769ZTN_GTF2F1
44006		ENCSR785OKZ_RB1
44007		ENCSR517QHU_BHLHE40
49151		ENCSR237YZZ_MAFF
51971		ENCSR904YPP_NR3C1
52674		ENCSR725LYT_ARID3A
54581		ENCSR585CVE_BACH1
54582
54583
55872
55962
55964
55966
55968
55974
55976
55978
59471
59472
59473
59474
67571
67572
68937
72156
Deleted from GEO
93023
93024
93030
93032
93033
94651
94662
KD
34713
37756
41352
41353
41354
41356
41357
41833
47343
47344
47767
47768
47769
67363
67540
67545
81951
83510
KO
43845
5935
5936
8539
48363
48364
48513
48514
48515
48516
50202
58925
58926
68336
68340
71071
71075
71177
71181
71183
72437
72441
72445
73263
73264
73285
73463
73465
73469
74264
74266
75371
75372
76746
81310
81689
83519
83522
85629
86507
86510
87434
87703
104077
shRNA
2866
2867
2868
2869
2879
2880
37689
51388
51389
53553
59476
72455
73003
73005
AID
85174
81237
85175
85176
Mutants
33721
33755
33762
33765
33779
33790
33794
36800
36816
36826
36828
36829
36831
54539
56193
71072
71698
71892
71895
71897
71898
72457
73286
73287
73288
75369
75370
83868
83869
86476
flox
71172
71174
71178
71179
71180
71891
75197
75219
75220
Treatments
53113
32907
34083
48938
48940
48943
48945
48948
48949
48950
53944
53947
53950
53951
67353
67354
68444
74265
87245
Transgene
4540
2870
2871
34528
34540
34548
44552
44553
55147
59428
75579
75787
Differentiated
55144
4501
43996
55145
55146
82624
82626
82629
sgRNA
44554
44533
44534
44535
44536
44556
44557
44560
51815
Mitotic
76350
76347
76353
