# Supplementary material for: Ultra-long-range interactions between active regulatory elements
Source: Genome Res. 2023 Aug;33(8):1269–83. doi: 10.1101/gr.277567.122 (PMC10547262; doi:10.1101/gr.277567.122)
Supplement: Supplement 6 [file Supplemental_Table_S6.xlsx]

## Sheet: Sheet1
Supplemental table S6
Processed peak files used in the study
Name	Genome	Input
CREs mouse	mm10	https://downloads.wenglab.org/V3/mm10-cCREs.bed
DNase mESC	mm10	https://www.encodeproject.org/files/ENCFF048DWN/@@download/ENCFF048DWN.bed.gz
DNase mESC	mm10	https://www.encodeproject.org/files/ENCFF228JUI/@@download/ENCFF228JUI.bed.gz
DNase mESC	mm10	https://www.encodeproject.org/files/ENCFF365YJX/@@download/ENCFF365YJX.bed.gz
DNase mESC	mm10	https://www.encodeproject.org/files/ENCFF417WYG/@@download/ENCFF417WYG.bed.gz
DNase mESC	mm10	https://www.encodeproject.org/files/ENCFF468CBV/@@download/ENCFF468CBV.bed.gz
DNase mESC	mm10	https://www.encodeproject.org/files/ENCFF565YPL/@@download/ENCFF565YPL.bed.gz
DNase mESC	mm10	https://www.encodeproject.org/files/ENCFF639EBX/@@download/ENCFF639EBX.bed.gz
DNase mESC	mm10	https://www.encodeproject.org/files/ENCFF765QCB/@@download/ENCFF765QCB.bed.gz
DNase mESC	mm10	https://www.encodeproject.org/files/ENCFF950SQZ/@@download/ENCFF950SQZ.bed.gz
RING1B mESCs	mm10	https://ftp.ncbi.nlm.nih.gov/geo/series/GSE96nnn/GSE96107/suppl/GSE96107_ES_Ring1B.IDR0.05.filt.narrowPeak.gz
CREs human	hg38	https://downloads.wenglab.org/V3/GRCh38-cCREs.bed
DNase GM12878	hg38	https://www.encodeproject.org/files/ENCFF759OLD/@@download/ENCFF759OLD.bed.gz
DNase GM12878	hg38	https://www.encodeproject.org/files/ENCFF338SAU/@@download/ENCFF338SAU.bed.gz
ATAC GM12878	hg38	https://www.encodeproject.org/files/ENCFF470YYO/@@download/ENCFF470YYO.bed.gz
ATAC GM12878	hg38	https://www.encodeproject.org/files/ENCFF748UZH/@@download/ENCFF748UZH.bed.gz
CAP-CGI	mm9	https://doi.org/10.1371/journal.pgen.1001134.s002
H3K27ac mESC	mm10	https://www.encodeproject.org/files/ENCFF519QMV/@@download/ENCFF519QMV.bed.gz
H3K27ac NPC	mm10	https://ftp.ncbi.nlm.nih.gov/geo/series/GSE96nnn/GSE96107/suppl/GSE96107_NPC_H3K27ac.IDR0.05.filt.narrowPeak.gz
CAP-CGI	hg18	https://doi.org/10.1371/journal.pgen.1001134.s001
H3K27ac Drosophila ED	dm3	ftp://ftp.ncbi.nlm.nih.gov/geo/samples/GSM1910nnn/GSM1910622/suppl/GSM1910622_EyeDisc_K27Ac_Enriched.bed.gz
PSC Drosophila ED	dm6	https://ftp.ncbi.nlm.nih.gov/geo/samples/GSM3619nnn/GSM3619410/suppl/GSM3619410_ChIP_PSC_ED_merge_peaks.narrowPeak.gz
SUZ12 Drosophila ED	dm6	https://ftp.ncbi.nlm.nih.gov/geo/samples/GSM3619nnn/GSM3619412/suppl/GSM3619412_ChIP_SUZ12_ED_merge_peaks.narrowPeak.gz
H3K27me3 HAP1	hg38	https://www.encodeproject.org/files/ENCFF391AYY/@@download/ENCFF391AYY.bed.gz
H3K27ac GM12878	hg38	https://www.encodeproject.org/files/ENCFF367KIF/@@download/ENCFF367KIF.bed.gz
H3K27me3 GM12878	hg38	https://www.encodeproject.org/files/ENCFF035PQG/@@download/ENCFF035PQG.bed.gz
MYC GM12878	hg38	https://www.encodeproject.org/files/ENCFF214XPD/@@download/ENCFF214XPD.bed.gz
Subcompartments GM12878	hg19	https://ftp.ncbi.nlm.nih.gov/geo/series/GSE63nnn/GSE63525/suppl/GSE63525_GM12878_subcompartments.bed.gz
