# Supplementary material for: Ultra-long-range interactions between active regulatory elements
Source: Genome Res. 2023 Aug;33(8):1269–83. doi: 10.1101/gr.277567.122 (PMC10547262; doi:10.1101/gr.277567.122)
Supplement: Supplement 7 [file Supplemental_Table_S7.xlsx]

## Sheet: Sheet1
Supplemental table S7
Other processed files used in the study
Name	Genome	Input
ReMap2022 data mouse	mm10	https://remap.univ-amu.fr/storage/remap2022/mm10/MACS2/remap2022_all_macs2_mm10_v1_0.bed.gz
ReMap2022 data human	hg38	https://remap.univ-amu.fr/storage/remap2022/hg38/MACS2/remap2022_all_macs2_hg38_v1_0.bed.gz
cistromeDB factor data mouse and human		http://cistrome.org/db/#/bdown
refGene GTF mouse	mm10	https://hgdownload.soe.ucsc.edu/goldenPath/mm10/bigZips/genes/mm10.refGene.gtf.gz
AnimalTFDB TFs mouse		http://bioinfo.life.hust.edu.cn/static/AnimalTFDB3/download/Mus_musculus_TF
AnimalTFDB Cofactors mouse		http://bioinfo.life.hust.edu.cn/static/AnimalTFDB3/download/Mus_musculus_TF_cofactors
AnimalTFDB TFs human		http://bioinfo.life.hust.edu.cn/static/AnimalTFDB3/download/Homo_sapiens_TF
AnimalTFDB Cofactors human		http://bioinfo.life.hust.edu.cn/static/AnimalTFDB3/download/Homo_sapiens_TF_cofactors
ENCODE DNase ESC bigWig	mm10	https://www.encodeproject.org/files/ENCFF672DJH/@@download/ENCFF672DJH.bigWig
ENCODE H3K27ac ESC bigWig	mm10	https://www.encodeproject.org/files/ENCFF583WVZ/@@download/ENCFF583WVZ.bigWig
Bonev et al. H3K27ac NPC bigWig	mm10	https://ftp.ncbi.nlm.nih.gov/geo/series/GSE96nnn/GSE96107/suppl/GSE96107_NPC_H3K27ac.bw
Zebrafish brain H3K27ac bigWig	zv10	https://vizhub.wustl.edu/privateHubs/ec9e0008c9dbfb860aa6/YueLab/brain.h3k27ac.merge.nodup.tagAlign_x_brain.input.merge.nodup.modify.tagAlign.fc.signal.bw
Zebrafish muscle H3K27ac bigWig	zv10	https://vizhub.wustl.edu/privateHubs/ec9e0008c9dbfb860aa6/YueLab/muscle.h3k27ac.merge.nodup.tagAlign_x_muscle.input.merge.nodup.modify.tagAlign.fc.signal.bw
Zebrafish brain WGBS bigWig	zv10	https://ftp.ncbi.nlm.nih.gov/geo/samples/GSM4662nnn/GSM4662071/suppl/GSM4662071_YueLab-WGBS-brain.CG.bw
Zebrafish muscle WGBS bigWig	zv10	https://ftp.ncbi.nlm.nih.gov/geo/samples/GSM4662nnn/GSM4662077/suppl/GSM4662077_YueLab-WGBS-muscle.CG.bw
Zebrafish H3K27ac quantification	zv10	https://static-content.springer.com/esm/art%3A10.1038%2Fs41586-020-2962-9/MediaObjects/41586_2020_2962_MOESM6_ESM.xlsx
THP-1 H3K27ac bigWig and quantification	hg19	https://ftp.ncbi.nlm.nih.gov/geo/series/GSE201nnn/GSE201352/suppl/GSE201352_RAW.tar
Drosophila ED RNA-seq	dm6	https://ftp.ncbi.nlm.nih.gov/geo/samples/GSM3937nnn/GSM3937266/suppl/GSM3937266_FC_phRNAi.txt.gz
dm6 GTF	dm6	ftp://ftp.flybase.net/genomes//Drosophila_melanogaster/dmel_r6.48_FB2022_05/gtf/dmel-all-r6.48.gtf.gz
GPSeq bins	hg19	https://raw.githubusercontent.com/ggirelli/GPSeq-source-data/master/figures/fig-02/fig-02-e.tsv
mESC H3K27ac DMSO	mm10	ftp://ftp.ncbi.nlm.nih.gov/geo/samples/GSM5007nnn/GSM5007850/suppl/GSM5007850_asynda.bw
mESC H3K27ac A-485	mm10	https://ftp.ncbi.nlm.nih.gov/geo/samples/GSM5007nnn/GSM5007852/suppl/GSM5007852_asynpa.bw
