# Supplementary material for: Ultra-long-range interactions between active regulatory elements
Source: Genome Res. 2023 Aug;33(8):1269–83. doi: 10.1101/gr.277567.122 (PMC10547262; doi:10.1101/gr.277567.122)
Supplement: Supplement 8 [file Supplemental_Table_S8.xlsx]

## Sheet: Sheet1
Supplemental table S8
DNA FISH probe names and coordinates
Name	Target	chrom	start [mm10]	end [mm10]
WI1-758A10	CRE1	chr1	72220420	72260763
WI1-1409D11	CRE2	chr1	63122283	63160201
WI1-288B18	control	chr1	63348293	63390976
WI1-975O12	CRE1	chr9	31262777	31299788
WI1-1792J10	CRE2	chr9	22370843	22411502
WI1-447D3	control	chr9	21644745	21687364
WI1-2157K10	CRE1	chrX	144301046	144341817
WI1-1109F23	CRE2	chrX	151002964	151041655
WI1-848F12	control	chrX	150675153	150710779
