# Supplementary material for: Ultra-long-range interactions between active regulatory elements
Source: HighWire-hosted journal article supplement (doi:10.1101/gr.277567.122), 2023-07-14
Supplement: Supplemental_Table_S1_.xlsx [file Supplemental_Table_S1_.xlsx]

## Sheet: Sheet1
Supplemental table S1
Enrichment values from the contact screen in mESCs
ID_Factor	Factor	Group	p_value_short	F_value_short	-log10_adj_p_short	p_value_long	F_value_long	-log10_adj_p_long
GSE80280_CTCF	CTCF	Cohesin	5.6031322672665445e-67	0.514695044983094	63.57670798473929	2.2629447256312687e-295	0.5116450375258804	291.97046491319367
GSE90994_RAD21	RAD21	Cohesin	0.0	0.532221038447599	inf	2.4508761779370405e-87	0.5052087373806424	83.93581748868618
GSE125129_RAD21	RAD21	Cohesin	0.0	0.5315104739924438	inf	3.494968825930847e-154	0.507010793145077	150.78169555293917
GSE90994_CTCF	CTCF	Cohesin	1.4189551026768739e-98	0.5172774996764	95.17317020514943	0.0	0.5128126631307437	inf
GSE126362_CTCF	CTCF	Cohesin	5.159080747693895e-251	0.5275168174033431	247.61256653394685	0.0	0.5200701399796067	inf
GSE80049_SMC3	SMC3	Cohesin	1.4412802917049681e-204	0.5255212022121809	201.16639041120084	0.0	0.5119982489130944	inf
GSE30203_CTCF	CTCF	Cohesin	3.6496191300736e-91	0.5174402858152096	87.76289131489833	0.0	0.5191752524915032	inf
GSE122830_MTA1	MTA1	TF	5.272695766871854e-13	0.50571825610707	9.603106145882656	0.0	0.584336671086899	inf
GSE64252_KDM4A	KDM4A	Co-factors	0.0	0.5669048980428962	inf	0.0	0.6039955977680764	inf
GSE64040_RAD23B	RAD23B	Other	2.6841837757008175e-63	0.4853590610971675	59.8963266122807	0.0	0.5779230308628074	inf
GSE140546_EP300	EP300	Co-factors	5.148062302505625e-22	0.5100829281386509	18.613495065110904	0.0	0.5564562202100777	inf
GSE71932_NANOG	NANOG	TF	1.32238181327758e-31	0.4895948575319063	28.20378199151149	0.0	0.5363888960908524	inf
GSE70486_TCF3	TCF3	TF	1.0248647524805595e-07	0.5041115329592136	4.314472302286884	0.0	0.5892126188042784	inf
GSE87820_NANOG	NANOG	TF	8.519822462334569e-11	0.5141391713087061	7.394708314311424	0.0	0.5396916314146447	inf
GSE43229_NANOG	NANOG	TF	0.0759217407755533	0.498636283903016	-1.5552272980146593	0.0	0.5648493508700636	inf
GSE25409_PRDM14	PRDM14	TF	5.179741884393746e-34	0.4902545790302601	30.610830740632103	0.0	0.5615858299793792	inf
GSE74055_RAD21	RAD21	Cohesin	2.7198194511044653e-211	0.5273914565698488	207.89059878390137	0.0	0.5277394126140473	inf
GSE80280_SMC3	SMC3	Cohesin	1.6397118216386613e-255	0.5268398104588269	252.11037133150072	6.64787779377874e-150	0.4930217669462831	146.5024558319361
GSE126362_SMC1A	SMC1A	Cohesin	0.0	0.5304474813200813	inf	0.0	0.5190051407856484	inf
ENCSR362VNF_CTCF	CTCF	Cohesin	8.091883675514599e-199	0.5231621046922464	195.41708922829804	4.5142258896429985e-121	0.5061340715036352	117.67055557209446
GSE36030_ZC3H11A	ZC3H11A	Other	0.0	0.545837800588101	inf	3.0847237408207234e-36	0.4959048490786722	32.835922583343304
GSE63324_WAPL	WAPL	Cohesin	1.4293255166781942e-256	0.5596540472810508	253.17000771234808	9.890484689288931e-71	0.4889946480912842	67.32992128427514
GSE81676_RAD21	RAD21	Cohesin	0.0	0.5331097599944522	inf	0.0	0.5107857805531438	inf
GSE123101_CTCF	CTCF	Cohesin	1.5504086629298918e-296	0.5284004147018149	293.1346926729223	3.1808645237552835e-133	0.5064531797976145	129.8225936868032
GSE67944_BRD2	BRD2	Co-factors	1.6947072497787288e-246	0.5267004159592533	243.09604417193628	0.0	0.5451973332716733	inf
GSE94834_EZH2	EZH2	Polycomb	1.011061963842032e-223	0.5816840062328631	220.32036108672753	0.0	0.6144335665230615	inf
GSE55630_JARID2	JARID2	Polycomb	2.9903029459795017e-142	0.6047101920954405	138.84942367056905	0.0	0.6273886075903854	inf
GSE55697_EZH2	EZH2	Polycomb	2.8404675180548964e-104	0.6117306013412135	100.87174903196124	0.0	0.6209886831873097	inf
GSE132752_EPOP	EPOP	Polycomb	0.0	0.5393290716376531	inf	0.0	0.6030109497666691	inf
GSE41314_EZH2	EZH2	Polycomb	1.1386377739119156e-218	0.6111887565419218	215.26875327197936	0.0	0.62597852553123	inf
GSE122715_SUZ12	SUZ12	Polycomb	6.131296627967959e-208	0.5700117868398491	204.53758653175453	0.0	0.612141228642547	inf
GSE96107_RNF2	RING1B	Polycomb	8.316177738905308e-241	0.5744263027296896	237.4052150964718	0.0	0.5979618694625615	inf
GSE61188_CHD4	CHD4	Repressive	8.450670797323518e-191	0.5241435137717491	187.398247675518	0.0	0.6018320985974965	inf
GSE41589_SUZ12	SUZ12	Polycomb	0.0	0.5573972491050045	inf	0.0	0.6058431372148184	inf
GSE137491_SUZ12	SUZ12	Polycomb	2.6024866001225068e-155	0.6415573601107692	151.90975035720174	0.0	0.6548368504547685	inf
GSE135762_SUZ12	SUZ12	Polycomb	0.0	0.5666053255071547	inf	0.0	0.6177001081090778	inf
GSE67868_PCGF2	PCGF2	Polycomb	5.741853968688603e-200	0.6559968440249171	196.56608671627745	0.0	0.656994018352232	inf
GSE42466_SUZ12	SUZ12	Polycomb	0.0	0.5758174577681063	inf	0.0	0.6078248656574665	inf
GSE19708_JARID2	JARID2	Polycomb	0.0	0.5385927617269859	inf	0.0	0.6035807746545591	inf
GSE127804_MTF2	MTF2	Polycomb	0.0	0.5583960765444594	inf	0.0	0.6080492249341896	inf
GSE116704_GABPA	GABPA	TF	0.0	0.5371393080365422	inf	0.0	0.6074592486471873	inf
GSE95055_DPPA4	DPPA4	Co-factors	4.2905712814762165e-212	0.5242688670317419	208.69262373773606	0.0	0.612542362836941	inf
GSE98723_CBX6	CBX6	Polycomb	5.231182949003711e-236	0.5864856241408016	232.60653895048435	0.0	0.6272038483800326	inf
GSE112113_HDAC1	HDAC1	Co-factors	0.0	0.570431321484403	inf	0.0	0.6341593376327125	inf
GSE135762_RNF2	RING1B	Polycomb	0.0	0.549477304343783	inf	0.0	0.6046908483124648	inf
GSE94429_JARID2	JARID2	Polycomb	7.497734944467579e-170	0.6098023973876525	166.45020877582934	0.0	0.6310442498400552	inf
GSE80280_MBD3	MBD3	TF	6.630223391755013e-134	0.5205520694786926	130.50361069795062	0.0	0.5993031552944996	inf
GSE81081_SIN3A	SIN3A	Repressive	0.0	0.5692979128387414	inf	0.0	0.6309513441302123	inf
GSE42466_RNF2	RING1B	Polycomb	4.181838247514437e-290	0.5702638725916382	286.7037716288605	0.0	0.6082385562045136	inf
GSE83094_RYBP	RYBP	Polycomb	0.0	0.5991739754056777	inf	0.0	0.6413215381141303	inf
GSE89929_EZH2	EZH2	Polycomb	0.0	0.5557451746947422	inf	0.0	0.6098060589689851	inf
GSE79606_EPOP	EPOP	Polycomb	2.9353539579855147e-304	0.5859191774001646	300.8574783813681	0.0	0.6225837336220382	inf
GSE83094_RNF2	RING1B	Polycomb	0.0	0.5656395775691598	inf	0.0	0.6203487015625954	inf
GSE80280_CHD4	CHD4	Repressive	6.822028119961266e-05	0.5030729913567157	1.4912253540531906	0.0	0.5884195210489106	inf
GSE60160_EZH2	EZH2	Polycomb	3.648426072487514e-221	0.6043505037420743	217.76303330862856	0.0	0.6255570792488936	inf
GSE122830_MTA3	MTA3	TF	0.0	0.5365610830600305	inf	0.0	0.597661383331582	inf
GSE134669_POU5F1	POU5F1	TF	8.820696204731932e-44	0.5111258540860255	40.379635994545254	0.0	0.5603612247858297	inf
GSE81081_SINHCAF	SINHCAF	Repressive	6.690844403744971e-256	0.5278901194761656	252.49965792882688	0.0	0.6060528671321112	inf
GSE57412_DNMT3B	DNMT3B	Repressive	0.3493760523606336	0.498916790276619	-2.218154274114937	0.0	0.5564668200700753	inf
GSE112132_REST	REST	Repressive	9.515776459000726e-06	0.5563388220470488	2.3466946280578225	6.632446364830196e-74	0.5955937268289683	70.50346511263986
GSE105006_BAP1	BAP1	Polycomb	0.0	0.5550318193377743	inf	0.0	0.6254146923805832	inf
GSE43275_POU5F1	POU5F1	TF	8.897846998752002e-74	0.5140438968156358	70.37585392561472	0.0	0.5764731917470748	inf
GSE103180_SUZ12	SUZ12	Polycomb	4.647945381492063e-242	0.6110415518457033	238.65787784329126	0.0	0.6212950439195977	inf
GSE117287_ZFP296	ZFP296	TF	3.191725857817988e-46	0.5191815596542155	42.82111327719434	0.0	0.5849511687412747	inf
GSE132752_RNF2	RING1B	Polycomb	0.0	0.5449908495986923	inf	0.0	0.6136586787133824	inf
GSE55404_TGIF2	TGIF2	TF	2.0533726237874163e-33	0.509187007217937	30.012671091688784	0.0	0.5782037572499158	inf
GSE125673_TRIM28	TRIM28	Repressive	0.001203691837823	0.4975529231205543	0.244623543655275	0.0	0.5918817941302856	inf
GSE118115_SUZ12	SUZ12	Polycomb	0.0	0.5486269251696693	inf	0.0	0.6182339571968909	inf
GSE134053_PCGF2	PCGF2	Polycomb	1.1780730030356918e-128	0.5973662068648748	125.25396665554014	0.0	0.6238610972470333	inf
GSE126362_LDB1	LDB1	Co-factors	0.2054006540094501	0.5065142746341015	-1.987462962824013	4.5233621890648225e-147	0.5512244715933551	143.66967749583318
GSE37268_KAT8	KAT8	Co-factors	4.287555702481782e-25	0.5077945740946369	21.692929083966856	0.0	0.5921538369670243	inf
GSE118115_EZH2	EZH2	Polycomb	0.0	0.5956445888422343	inf	0.0	0.6317813489075847	inf
GSE27841_REST	REST	Repressive	1.0415766838539747e-28	0.5147834399675375	25.307447609799684	0.0	0.5769208304990143	inf
GSE69955_RNF2	RING1B	Polycomb	0.0	0.554098041394826	inf	0.0	0.6052338099257161	inf
GSE125116_FOXH1	FOXH1	TF	0.0006731820231056	0.4973705915309206	0.49700634935929755	0.0	0.5918643851876374	inf
GSE125116_SMAD3	SMAD3	TF	0.0	0.5337778439558482	inf	0.0	0.6085052166298376	inf
GSE27841_CHD4	CHD4	Repressive	1.5747570295886513e-13	0.5058962220148177	10.127925303580334	0.0	0.5690919951275819	inf
GSE94300_MTF2	MTF2	Polycomb	1.022803994417943e-191	0.6019028902054135	188.31534644382822	0.0	0.6188157495592942	inf
GSE96593_HTATSF1	HTATSF1	Co-factors	9.174103810056515e-275	0.5283025982234243	271.36257520915626	0.0	0.6156479498679274	inf
GSE56876_HDAC1	HDAC1	Co-factors	1.352680789804176e-16	0.5698837767430243	13.193943536857219	1.1516056708230927e-256	0.6210188426331889	253.26383506446538
GSE115964_TET2	TET2	TF	2.739149457624317e-09	0.5045232238697465	5.887523129727954	0.0	0.5945598787401924	inf
GSE27148_REST	REST	Repressive	3.2618774307403214e-05	0.5303864677738427	1.8116712214277142	2.1679448411415989e-144	0.5757211555837838	140.98909063097727
GSE69140_BRD4	BRD4	Co-factors	5.190626011897612e-254	0.5290720259383743	250.60991912046623	0.0	0.589559654684415	inf
GSE21614_MYOD1	MYOD1	TF	3.805438270572284e-27	0.5231848012669764	23.744734177779748	0.0	0.5922650168838371	inf
GSE43229_SUPT5	SUPT5	Co-factors	5.512680691137717e-219	0.5267239502994138	215.58377602152498	0.0	0.606445429716266	inf
GSE27841_HDAC2	HDAC2	Co-factors	1.3230578948617518e-28	0.5085034026974008	25.20356001063866	0.0	0.5868293349304371	inf
GSE48320_REST	REST	Repressive	0.0007804265578583	0.5293373741683924	0.43280681927899656	2.5194871784433212e-92	0.5728227691390809	88.92382670666981
GSE27841_HDAC1	HDAC1	Co-factors	5.839441506286113e-234	0.5355476393086204	230.5587675467965	0.0	0.5987518327801115	inf
GSE72082_GABPA	GABPA	TF	2.4029810812927237e-279	0.5730043182458847	275.94438850765204	0.0	0.6047620954517433	inf
GSE132752_PCGF1	PCGF1	Polycomb	0.0	0.5566649694258523	inf	0.0	0.6277889172888691	inf
GSE30267_CDK9	CDK9	Co-factors	1.181926784739004e-295	0.5806882144518495	292.2525482845517	0.0	0.6330872808064957	inf
GSE132752_PCGF2	PCGF2	Polycomb	2.8796855944306016e-111	0.5999120686579573	107.86579378541185	0.0	0.6301893158453328	inf
GSE44286_CDK9	CDK9	Co-factors	2.79163641527989e-13	0.505506791256516	9.879280004451427	0.0	0.5672887424686154	inf
GSE36030_HCFC1	HCFC1	Co-factors	2.1570120886531006e-189	0.5226589454775863	185.99128628021407	0.0	0.5840349242891743	inf
GSE90893_HDAC1	HDAC1	Co-factors	1.437711189498099e-15	0.5061914157331784	12.167467206459172	0.0	0.5957074654521707	inf
GSE53233_SMAD2-3	SMAD2-3	TF	1.0920060971591109e-54	0.5132826976755445	51.286913796026106	0.0	0.5835504246397389	inf
GSE34518_RNF2	RING1B	Polycomb	2.85191645996496e-235	0.5473446217111759	231.8700020595086	0.0	0.5928068673341252	inf
GSE126496_SP3	SP3	TF	3.496474520820931e-88	0.5150083914603276	84.78150849142415	0.0	0.5852964596905256	inf
GSE70974_SUZ12	SUZ12	Polycomb	6.955252240242392e-111	0.6926743656850252	107.48282597445836	0.0	0.7016953408756873	inf
GSE98723_CBX7	CBX7	Polycomb	9.529432520394327e-149	0.6108664943514948	145.34607182017677	0.0	0.6297753969056578	inf
GSE53936_KDM4C	KDM4C	Co-factors	0.0	0.5801883287706768	inf	0.0	0.6302337225709975	inf
GSE76823_RYBP	RYBP	Polycomb	0.0	0.6058662160879051	inf	0.0	0.6416337472651864	inf
GSE98723_RNF2	RING1B	Polycomb	1.305952933855034e-121	0.6128609818769007	118.20921133388161	0.0	0.6278672366034143	inf
GSE140546_JARID2	JARID2	Polycomb	1.3408987703834406e-200	0.560281020435877	197.19774286673746	0.0	0.6028044200012878	inf
GSE127804_SUZ12	SUZ12	Polycomb	0.0	0.5604438898627404	inf	0.0	0.6080021005602282	inf
GSE126400_ISL1	ISL1	TF	0.0	0.5413194296501912	inf	0.0	0.6208896006581834	inf
GSE112311_SUZ12	SUZ12	Polycomb	0.0	0.6101481021287085	inf	0.0	0.6298263288251722	inf
GSE125047_ZBTB11	ZBTB11	TF	3.1785617814968444e-251	0.5278748965253885	247.82290820206032	0.0	0.6013448388479369	inf
GSE68195_YY1	YY1	TF	4.3130190678802594e-39	0.4890060146466792	35.69035748109378	0.0	0.5744175630514222	inf
GSE126257_EZH2	EZH2	Polycomb	9.511814856896085e-44	0.6668856751467116	40.34687547091174	4.6684750245413775e-238	0.6738356619608917	234.65596381950647
GSE16526_MTF2	MTF2	Polycomb	0.0	0.5767432250775429	inf	0.0	0.5965300733237346	inf
GSE98754_CDK8	CDK8	Co-factors	0.0	0.5865747151195798	inf	0.0	0.6228237982945166	inf
GSE55697_SUZ12	SUZ12	Polycomb	1.300880662544979e-103	0.6037551282074795	100.21090140126736	0.0	0.6157481856635193	inf
GSE132752_PCGF6	PCGF6	Polycomb	0.0	0.5670360175845968	inf	0.0	0.6192415444144191	inf
GSE49431_SUZ12	SUZ12	Polycomb	1.2331413788327142e-211	0.5890448775329246	208.23412598824063	0.0	0.6238255210217623	inf
GSE140546_YY1	YY1	TF	3.776472756250361e-165	0.5254447921578547	161.74805250324974	0.0	0.5952477824835523	inf
GSE49848_KLF4	KLF4	TF	6.11365651773787e-18	0.5065744182694564	14.538837824061105	0.0	0.5910746779561876	inf
GSE132752_JARID2	JARID2	Polycomb	1.6338499479122072e-146	0.6050039121213332	143.1119266906558	0.0	0.6264094740060399	inf
GSE42466_CBX7	CBX7	Polycomb	7.971825887894979e-222	0.6426711202827571	218.4235810545263	0.0	0.6408280114405839	inf
GSE88823_CBX7	CBX7	Polycomb	8.055271588236696e-211	0.5829578963664174	207.41905867176527	0.0	0.618953761805921	inf
GSE52071_KMT2B	KMT2B	Co-factors	7.546271907365729e-22	0.5076285592578024	18.447406409610963	0.0	0.579236447425491	inf
GSE74330_RNF2	RING1B	Polycomb	0.0	0.5536655650501711	inf	0.0	0.5965227847353978	inf
GSE43229_KDM4B	KDM4B	Co-factors	5.038707433285134e-80	0.5146243675656278	76.62281971698076	0.0	0.6043668378727721	inf
GSE103685_SUZ12	SUZ12	Polycomb	2.857648751141094e-214	0.6238989949954242	210.86913001297935	0.0	0.6382163299781503	inf
GSE43229_EZH2	EZH2	Polycomb	1.548873463461554e-251	0.6656583912100493	248.13512292011183	0.0	0.6437996634087743	inf
GSE64540_HES5	HES5	TF	4.836732344606454e-277	0.5961158714737278	273.6405868042237	0.0	0.6484273674316328	inf
GSE99847_E2F1	E2F1	TF	0.0	0.6011505851380079	inf	0.0	0.6520817927600872	inf
GSE43229_POU5F1	POU5F1	TF	1.0980715407673523e-101	0.5182795828355137	98.28450822338459	0.0	0.5644297086677759	inf
GSE117287_CHD4	CHD4	Repressive	6.938000726308784e-40	0.5108125471103269	36.483904518291766	0.0	0.5952888057772892	inf
GSE94688_TET3	TET3	Repressive	0.0	0.5534870257978222	inf	0.0	0.6155886126147816	inf
GSE127804_JARID2	JARID2	Polycomb	5.7595444367336284e-226	0.6303470812747891	222.56475072591488	0.0	0.6314015719835132	inf
GSE28532_TET1	TET1	Repressive	6.523355674686368e-167	0.5508794207861224	163.51066780093862	0.0	0.6085316427738603	inf
GSE45625_TOP2A	TOP2A	Other	0.0	0.5552089858863944	inf	0.0	0.6397098362418608	inf
GSE122715_RNF2	RING1B	Polycomb	3.3694739548609105e-212	0.5787646750329553	208.79757675552253	0.0	0.6128998178167102	inf
GSE55697_RNF2	RING1B	Polycomb	0.0	0.5444956325319389	inf	0.0	0.5955046919793355	inf
GSE49848_KLF5	KLF5	TF	0.0001656177182236	0.4971128054876995	1.1060320623500899	0.0	0.5816885765473906	inf
GSE125435_MYC	MYC	TF	3.7669286629493752e-221	0.5275786019760873	217.74915146352953	0.0	0.6014569156894713	inf
GSE52496_SP1	SP1	TF	5.534732015738089e-221	0.5274491295091189	217.58204226149167	0.0	0.595039444509477	inf
ENCSR000CCD_EP300	EP300	Co-factors	1.9414431858276335e-38	0.5113614970298335	35.03701417333844	0.0	0.5752815992124313	inf
GSE29218_EP300	EP300	Co-factors	6.796028523583076e-33	0.5107159144576416	29.492883666285792	0.0	0.5758753263274511	inf
GSE122830_MTA2	MTA2	TF	3.0136563928075024e-76	0.5144413555541797	72.8460451252897	0.0	0.593346919851947	inf
GSE80557_SUZ12	SUZ12	Polycomb	5.4404080717931685e-176	0.5862545194452355	172.58950738296818	0.0	0.6043638482451726	inf
GSE126496_SP1	SP1	TF	0.0	0.5329179666921817	inf	0.0	0.6093047494856402	inf
GSE81042_ZFP281	ZFP281	TF	2.536498954759128e-87	0.5222053537077317	83.92090417157287	0.0	0.5930734292403137	inf
GSE31456_ISL1-2	ISL1-2	TF	1.461893924281333e-50	0.5139969353877266	47.160222998111344	0.0	0.5549438155885388	inf
GSE132752_SUZ12	SUZ12	Polycomb	4.1600251332611774e-190	0.6117476376273798	186.7060429047884	0.0	0.6368540572699639	inf
GSE122715_PCGF2	PCGF2	Polycomb	8.690544224778113e-169	0.5893126164382038	165.38609188529713	0.0	0.6201943685810966	inf
GSE131014_ZFP281	ZFP281	TF	1.3824356202180915e-120	0.5262317204602931	117.18449394383161	0.0	0.60295328357189	inf
GSE65093_POU5F1	POU5F1	TF	4.4311826218138774e-194	0.5350818177748841	190.67861921033378	0.0	0.576922715348404	inf
GSE61188_MBD3	MBD3	TF	0.0	0.555143369492532	inf	0.0	0.6121405466481175	inf
GSE116603_RNF2	RING1B	Polycomb	7.846763405631999e-204	0.6166659894459044	200.430448301234	0.0	0.6318261042734762	inf
GSE23716_RNF2	RING1B	Polycomb	1.4624918617567842e-239	0.6258355174734501	236.16004540119442	0.0	0.6419388104118946	inf
GSE84899_CREBBP	CREBBP	Co-factors	0.0	0.541349641832978	inf	0.0	0.6056203987977664	inf
GSE41314_RNF2	RING1B	Polycomb	6.621983778931729e-206	0.669004723672991	202.50415074668322	0.0	0.657558710844528	inf
GSE116603_SUZ12	SUZ12	Polycomb	8.072004826998512e-287	0.599078356692538	283.4181574463284	0.0	0.6240471041036714	inf
GSE31785_YY1	YY1	TF	9.231613249564671e-284	0.5316569551189184	280.3598612574603	0.0	0.5940199079046802	inf
GSE132752_AEBP2	AEBP2	TF	2.215205154019794e-263	0.5301498557040338	259.97972490606975	0.0	0.582150779972966	inf
GSE18515_KDM1A	KDM1A	Co-factors	1.6867812092707085e-184	0.5654520602309574	181.0980801049295	0.0	0.6340567458287037	inf
GSE71883_RNF2	RING1B	Polycomb	1.761646003745848e-186	0.5605277630796536	183.07922021629022	0.0	0.6236198588397946	inf
GSE113429_KLF4	KLF4	TF	7.897885214222662e-268	0.5357679062920323	264.4276280417371	0.0	0.6054742283461707	inf
GSE103180_EZH2	EZH2	Polycomb	4.448210453047823e-180	0.5906691439756281	176.67695353292848	0.0	0.6132774251843841	inf
GSE94142_T	T	TF	5.717600255829747e-29	0.516125773852392	25.567925070736894	0.0	0.5602275508236729	inf
GSE90893_KLF4	KLF4	TF	1.8862395195953472e-34	0.4905468377284015	31.049542019517403	0.0	0.5747682726634781	inf
GSE76637_ZMYND8	ZMYND8	Co-factors	0.0	0.5379972576338911	inf	0.0	0.5940553680776474	inf
GSE61188_ZIC2	ZIC2	TF	7.361359140398462e-113	0.5211578437354899	109.45818085298437	0.0	0.5774435311530793	inf
GSE103053_POU5F1	POU5F1	TF	6.920350970127509e-44	0.5768382884873715	40.48501073871808	9.999102960027361e-105	0.5437162991382286	101.32517781896065
GSE56312_NANOG	NANOG	TF	1.5510446513465667e-64	0.4866986218740143	61.134514558834596	0.0	0.5537492576980663	inf
GSE126554_POU5F1	POU5F1	TF	1.6583047756260668e-23	0.509904371037761	20.105474507831648	0.0	0.5501884035650745	inf
GSE103053_SOX2	SOX2	TF	1.2723686244986172e-48	0.5493568314518462	45.22052590801825	9.299827007727365e-283	0.5433853745573214	279.3566639892339
GSE44286_SOX2	SOX2	TF	2.5332442123820853e-25	0.5183255871330023	21.9214618001556	0.0	0.5448271070829467	inf
GSE44286_POU5F1	POU5F1	TF	0.3350624131417357	0.4992555950842923	-2.1999868527250044	0.0	0.5615434304157346	inf
GSE70661_TBP	TBP	Co-factors	2.675822182069536e-12	0.5056249117842281	8.89768160962525	0.0	0.5629159362801948	inf
GSE43275_SOX2	SOX2	TF	1.6718581924997217e-18	0.5067735452801699	15.101939421581841	0.0	0.5592721148450946	inf
GSE43275_SOX17	SOX17	TF	8.005949883477335e-39	0.5221202266817315	35.4217259921288	0.0	0.5551230730799683	inf
GSE90893_SOX2	SOX2	TF	1.4699010555868552e-30	0.4905673134360323	27.15785075747924	0.0	0.5392543741969857	inf
GSE35496_SOX2	SOX2	TF	2.434896719404281e-16	0.5117010158232166	12.938658314715266	0.0	0.5379126765073248	inf
GSE24164_EP300	EP300	Co-factors	0.0294095454480877	0.5017269747887984	-1.1433494528711028	0.0	0.5736504435364669	inf
ENCSR531HWD_CHD2	CHD2	Co-factors	6.900547576324576e-102	0.5441857507509901	98.48625530476544	0.0	0.593065157612336	inf
GSE74599_SOX2	SOX2	TF	2.778139961525246e-27	0.5307546493972565	23.88138473773571	1.8079105549941897e-288	0.5374877751844456	285.067961918982
GSE90752_ARID3A	ARID3A	TF	3.3899031373542843e-22	0.5131376661557469	18.794951570355135	0.0	0.5541523887765868	inf
GSE78708_KMT2D	KMT2D	Co-factors	9.02410618826183e-310	0.5290696327279215	306.3697346621725	0.0	0.595399089325232	inf
GSE56098_EP300	EP300	Co-factors	0.1558629492949252	0.4988242331318476	-1.867604030595505	0.0	0.5606895613993885	inf
GSE22341_EP300	EP300	Co-factors	1.4128024369192494e-19	0.5422919128413514	16.175057423920773	9.70310600229717e-274	0.5610776705805948	270.33822808337345
GSE52071_ASH2L	ASH2L	Co-factors	0.8505334643480745	0.4998013034431519	-2.604552546394567	0.0	0.5531185383707491	inf
GSE119697_CTCF	CTCF	Cohesin	3.5243773619209155e-197	0.5233402481455852	193.7780564562799	0.0	0.5155011538138066	inf
GSE112132_CTCF	CTCF	Cohesin	0.0	0.5301474101323372	inf	0.0	0.5161661177427443	inf
GSE18699_CTCF	CTCF	Cohesin	2.8759788897341558e-288	0.5309737549536994	284.86635316534887	0.0	0.5205457156646741	inf
GSE114599_CTCF	CTCF	Cohesin	5.529528196210963e-289	0.5278627338348549	285.5824507823017	0.0	0.5216136684646311	inf
GSE34094_CTCF	CTCF	Cohesin	0.0	0.5301159291403253	inf	0.0	0.5169544395959735	inf
GSE29218_CTCF	CTCF	Cohesin	9.084860335084603e-250	0.5259489154497368	246.3668206041364	0.0	0.5190851157323945	inf
ENCSR000CCB_CTCF	CTCF	Cohesin	3.556468173564956e-247	0.5258289056650417	243.77411993266358	0.0	0.5176400936682933	inf
GSE60232_CTCF	CTCF	Cohesin	1.1637692647381737e-302	0.5289503750175552	299.25927197601374	0.0	0.5175618359768643	inf
GSE25777_CTCF	CTCF	Cohesin	1.3876164292327747e-190	0.5259474772465956	187.18286942606068	0.0	0.5154274536248786	inf
ENCSR000ERV_ZFP384	ZFP384	TF	0.0750616685061297	0.5019941042063605	-1.5502793546245137	0.0	0.5527575734055166	inf
ENCSR000ERV_ZFP414	ZFP414	TF	0.0369110941043775	0.5027848428272766	-1.2420180593133494	0.0	0.5560751063116364	inf
GSE44286_CDK8	CDK8	Co-factors	1.020026916888314e-51	0.5118708621833992	48.31652722700829	0.0	0.5788134049645824	inf
GSE24029_RAD21	RAD21	Cohesin	0.0	0.5469103750972721	inf	1.6469314872924036e-148	0.4893333737569194	145.10846332646145
GSE125293_CTCF	CTCF	Cohesin	0.0	0.5359354412688172	inf	1.3580266028923238e-148	0.506879168607514	145.19223058167694
GSE69322_GATA6	GATA6	TF	0.0095185568831973	0.5039780267812244	-0.6534322503437272	0.0	0.5700447036721686	inf
GSE36905_EZH2	EZH2	Polycomb	1.3559690365905796e-182	0.6561501360115252	179.19288908668645	0.0	0.6524547832453652	inf
GSE85717_EZH2	EZH2	Polycomb	1.0736178597306764e-297	0.5916478256585497	294.294289131849	0.0	0.6167131902374469	inf
GSE135762_CBX7	CBX7	Polycomb	2.1063909926155594e-140	0.653995731332012	137.00159987029755	0.0	0.6644141633877955	inf
GSE70799_SUMO2-3	SUMO2-3	Other	1.4355427468729224e-71	0.5238594899098993	68.16812273003355	0.0	0.5812344701768329	inf
GSE66830_SUZ12	SUZ12	Polycomb	9.20070867249121e-161	0.6773801771518759	157.36131757966672	0.0	0.6579206375300033	inf
GSE22934_POU5F1	POU5F1	TF	0.0	0.5549480907461418	inf	0.0	0.6214523190134983	inf
GSE122715_WDR5	WDR5	Co-factors	0.0	0.562689260964772	inf	0.0	0.6175941865352277	inf
GSE111433_EZH2	EZH2	Polycomb	1.3962489997763148e-245	0.6393068300066482	242.18017598425172	0.0	0.6514794543612911	inf
GSE117287_SIN3A	SIN3A	Repressive	6.388017143013253e-159	0.5207878027177335	155.51977278631264	0.0	0.5990211972532106	inf
GSE88769_BRD4	BRD4	Co-factors	0.0	0.555322183092525	inf	0.0	0.6071513237574778	inf
GSE78899_EZH2	EZH2	Polycomb	8.485616615226535e-77	0.8258935661187063	73.39645545304923	0.0	0.7766671071141343	inf
GSE45447_SMARCA4	SMARCA4	Co-factors	1.627775801071242e-27	0.548713351027264	24.113544271401103	1.885534228161477e-305	0.5621015065769829	302.04970443868774
GSE102753_EED	EED	Polycomb	4.8118411879505056e-92	0.743972871749314	88.64282757399732	0.0	0.7126935196012656	inf
GSE17642_SETDB1	SETDB1	TF	1.2870581875914197e-13	0.5236890878746433	10.215540677564777	0.0	0.5622808067639922	inf
GSE67580_EP400	EP400	Co-factors	1.2753760692318795e-25	0.6084677958265512	22.219500595503884	1.060944429653797e-309	0.6634525315357716	306.2994462223229
GSE90893_ESRRB	ESRRB	TF	3.6360007253102375e-41	0.4896346618665686	37.76451489807909	0.0	0.5555787346763812	inf
GSE67867_NRF1	NRF1	TF	5.804736440611858e-106	0.4827674839492396	102.56135635353151	0.0	0.5958599992619379	inf
ENCSR392DGA_POU5F1	POU5F1	TF	5.410461558241146e-24	0.5344099383176757	20.59190454357395	0.0	0.571342448516238	inf
GSE22934_RBBP5	RBBP5	Co-factors	0.0	0.5912043546407533	inf	0.0	0.6368555814171075	inf
GSE65730_ZFP217	ZFP217	TF	0.0	0.5652358735372822	inf	0.0	0.6322142594564363	inf
GSE131014_ZIC2	ZIC2	TF	0.0	0.5412013071903724	inf	0.0	0.6043018459325333	inf
GSE72989_SP5	SP5	TF	7.936649122462945e-45	0.5411672563166811	41.425501678597044	0.0	0.5995914175312449	inf
GSE56839_NFYA	NFYA	TF	2.0902851276289937e-118	0.5459872888092433	115.0049333286966	0.0	0.6068625403969653	inf
GSE125116_SMAD2	SMAD2	TF	3.522714416036646e-309	0.5384725018264773	305.7782614226	0.0	0.6055644033983579	inf
GSE87734_TRIM28	TRIM28	Repressive	0.0335941285457178	0.4944335322992015	-1.2011245204188175	0.0	0.5436217245182007	inf
GSE89929_CBX2	CBX2	Polycomb	2.194529959288491e-95	0.6242818884019873	91.98379734513846	0.0	0.6629914649083006	inf
GSE89929_CBX7	CBX7	Polycomb	8.429809965333022e-101	0.7223907903329152	97.39932107490287	0.0	0.7153178156605063	inf
GSE49431_EZH2	EZH2	Polycomb	0.0	0.5758045279490595	inf	0.0	0.6331420947508121	inf
GSE81203_RNF2	RING1B	Polycomb	6.743497813483531e-58	0.8395371139606231	54.496253638237675	3.7715969963171246e-184	0.779291069664301	180.74861357806702
GSE70974_JARID2	JARID2	Polycomb	4.609374434851899e-140	0.6512036230487444	136.66149687051606	0.0	0.6604032236268329	inf
GSE60397_SUZ12	SUZ12	Polycomb	6.414863035820184e-271	0.6566866818891363	267.51795147110346	0.0	0.6456042911196515	inf
GSE52073_JARID2	JARID2	Polycomb	1.2166694297440784e-138	0.738392829140127	135.23996626323395	0.0	0.7051876401813965	inf
GSE60397_JARID2	JARID2	Polycomb	1.4078578040048837e-111	0.5703666445193227	108.17658006671078	0.0	0.5908984534606404	inf
GSE43229_KDM4C	KDM4C	Co-factors	0.4119991836907147	0.5006406446660586	-2.289757496288011	0.0	0.5920708824033513	inf
GSE39610_MBD4	MBD4	TF	3.5699398396163514e-18	0.5177487306323995	14.772477961789434	0.0	0.5798625405781234	inf
GSE40423_FOXA2	FOXA2	TF	0.0118615580552553	0.512696397455935	-0.7490028795432474	1.942511488041166e-129	0.5464472391153132	126.03677526335777
GSE132752_MTF2	MTF2	Polycomb	4.7137679607558865e-139	0.6841377006396571	135.65177065906363	0.0	0.6870783320536573	inf
GSE116704_SP3	SP3	TF	9.555708249964422e-221	0.5738971316087259	217.3448759776407	0.0	0.6320742539666095	inf
GSE22934_WDR5	WDR5	Co-factors	0.0	0.5810214737661822	inf	0.0	0.6225023696410209	inf
GSE56098_OTX2	OTX2	TF	3.4000310615460817e-28	0.5086764121485544	24.793655974632745	0.0	0.5210460817852405	inf
GSE72164_RNF2	RING1B	Polycomb	0.0	0.5516998728515563	inf	0.0	0.5991908246424631	inf
GSE120302_RNF2	RING1B	Polycomb	0.0	0.5529919703069409	inf	0.0	0.6105398238573118	inf
GSE94300_JARID2	JARID2	Polycomb	1.202166266915698e-281	0.5440580516722704	278.24517432186974	0.0	0.5980988568475798	inf
GSE93721_KDM4C	KDM4C	Co-factors	9.734617047798619e-33	0.5091672079299557	29.336819987874467	0.0	0.5924873409344513	inf
GSE79606_SUZ12	SUZ12	Polycomb	2.2507468070582155e-154	0.5794071788842288	150.9728122165416	0.0	0.6091949523713904	inf
GSE72164_SUZ12	SUZ12	Polycomb	6.076091677435416e-227	0.5992304233546869	223.54151454128936	0.0	0.6231062243681108	inf
GSE80049_SMARCC1	SMARCC1	TF	1.3246773831799692e-251	0.5626756494506948	248.20302873779303	0.0	0.6123780391738823	inf
GSE78899_RNF2	RING1B	Polycomb	4.36118542191419e-156	0.6252461830697313	152.68553430755728	0.0	0.6526261566369822	inf
GSE123174_EZH2	EZH2	Polycomb	1.0164514742634237e-108	0.5931446245385937	105.31805220915844	0.0	0.6213589431776925	inf
GSE90906_SUPT16	SUPT16	Co-factors	0.0023399092921764	0.5022612150296389	-0.044060162818549374	0.0	0.6023566638696622	inf
GSE94300_EZH2	EZH2	Polycomb	1.6657320315458422e-203	0.6004599061187899	200.1035337220842	0.0	0.6177096425975481	inf
GSE83094_SUZ12	SUZ12	Polycomb	0.0	0.5830550979672696	inf	0.0	0.6170442703991897	inf
GSE83082_SUZ12	SUZ12	Polycomb	0.0	0.5833267322568438	inf	0.0	0.6170622842800827	inf
GSE87820_SOX2	SOX2	TF	1.1816210360998652e-27	0.5175096261204284	24.252660645254867	0.0	0.5522839205760726	inf
GSE41720_TET2	TET2	TF	9.17191278767691e-118	0.623258277982362	114.3626789427301	0.0	0.6399881149845456	inf
GSE80049_MED12	MED12	Co-factors	0.0002062096827731	0.5421974952786534	1.010829805122662	1.5005577797255387e-38	0.5550378840199648	35.14888613645377
GSE37889_ZIC3	ZIC3	TF	1.1565021018693102e-100	0.5358006914025399	97.26199243285213	0.0	0.5953984479778339	inf
GSE70579_SMAD1	SMAD1	TF	1.1294490932992646e-06	0.5186721883387926	3.2722721981514042	0.0	0.5742692383104789	inf
GSE70799_TRIM28	TRIM28	Repressive	1.9771086403277804e-102	0.5333155212130101	99.02910832520469	0.0	0.6080092026499985	inf
GSE113334_POU5F1	POU5F1	TF	4.5089467775000166e-14	0.5595195888057288	10.671063750230728	2.6449200723377328e-127	0.5728457540716244	123.9027263067727
GSE90893_POU5F1	POU5F1	TF	1.360051075397689e-11	0.4948150360683556	8.1915836410781	0.0	0.5463341889620398	inf
GSE64008_RNF2	RING1B	Polycomb	4.452151804070095e-42	0.5145107416870771	38.676568895300775	0.0	0.5982603089155727	inf
GSE80049_MED1	MED1	Co-factors	6.659993135167129e-10	0.5659875681801718	6.501665077743625	3.5724757973479983e-66	0.5702997142921798	62.77216956402838
GSE51746_MCRS1	MCRS1	Co-factors	7.230204298854334e-122	0.5181490931334592	118.46598829023715	0.0	0.60472543286261	inf
GSE90893_MYC	MYC	TF	1.1532514809792997e-194	0.5874013463819204	191.26321483827044	0.0	0.6476642119505664	inf
GSE51746_KAT8	KAT8	Co-factors	0.0	0.5679031620955052	inf	0.0	0.6092991348569043	inf
GSE43229_MYC	MYC	TF	5.278228431789776e-82	0.5746339675543861	78.60265067752385	0.0	0.6052199183206113	inf
GSE48175_MYC	MYC	TF	3.272720628117319e-160	0.5844894563613298	156.81022992540102	0.0	0.634125963604071	inf
GSE70661_GTF2B	GTF2B	Co-factors	0.0	0.5695681752560866	inf	0.0	0.6209079505678388	inf
GSE90752_GATA3	GATA3	TF	2.1729948261569064e-261	0.5559004529016208	257.9880801669841	0.0	0.6178908741390834	inf
GSE42466_RYBP	RYBP	Polycomb	2.124642067121228e-12	0.600187101729891	8.997853083166394	3.7040635591814636e-96	0.6217055992603057	92.75646042899393
GSE99518_YY1	YY1	TF	9.101247300853264e-05	0.5029601746819234	1.3660379440007446	0.0	0.5848033637931959	inf
GSE48175_MAX	MAX	TF	0.0	0.5590928503877739	inf	0.0	0.6148708972486663	inf
GSE86911_THAP1	THAP1	TF	1.962581967937649e-44	0.5379359026281424	41.032311055001784	0.0	0.5846656748805722	inf
GSE137491_RBP1	RPB1	Co-factors	2.628099716481093e-33	0.6091719874982612	29.90549701987524	0.0	0.6633348124449973	inf
GSE74055_MED12	MED12	Co-factors	0.000110499013037	0.5616359669983866	1.2817804602862986	4.728571236771959e-69	0.614352543056615	65.6504089231165
GSE102517_KLF4	KLF4	TF	2.4696186583254742e-263	0.5576214679623415	259.9325089616182	0.0	0.6193956068764788	inf
GSE74112_POU5F1	POU5F1	TF	2.7895611408885913e-28	0.5108696709462138	24.879602974655956	0.0	0.5623347885851974	inf
GSE26361_TRP53	TRP53	TF	0.3862631794953755	0.502015551773357	-2.2617444517712606	0.0	0.565705949073001	inf
GSE39435_CDX2	CDX2	TF	0.0347872191698078	0.5048599164750882	-1.2162808541224517	0.0	0.5430890136298517	inf
GSE59378_NANOG	NANOG	TF	3.7893827767272264e-14	0.5149432835698712	10.74657038240523	0.0	0.5302166357539193	inf
GSE129179_MED1	MED1	Co-factors	1.258205122129906e-21	0.5742055223947796	18.225387410404757	3.1465447529171565e-151	0.5774868949706075	147.82730494621802
GSE90893_SMARCA4	SMARCA4	Co-factors	0.0435613251858692	0.4982197139992323	-1.3139622237626967	0.0	0.5668419138553373	inf
GSE102517_SOX2	SOX2	TF	9.359267721772677e-14	0.5142664546309017	10.353896988818345	0.0	0.5507397326679901	inf
GSE110950_EP300	EP300	Co-factors	6.0500499537075375e-46	0.5351811927167736	42.543379898737	0.0	0.5819606907527523	inf
GSE57700_TET2	TET2	TF	1.0044091802919029e-45	0.5573466555594146	42.32322818575506	0.0	0.6115044757221851	inf
GSE90893_EP300	EP300	Co-factors	1.0290847186720343e-13	0.5088948426232728	10.312687730041773	0.0	0.5445639368582109	inf
ENCSR779CZG_NANOG	NANOG	TF	0.000332592105429	0.5046820876898636	0.8032269228853419	0.0	0.5470652117255841	inf
GSE65072_NEUROD1	NEUROD1	TF	4.039929955033213e-05	0.5376248409701493	1.7187650239551167	5.2666134892254254e-76	0.5628360992584249	72.60360741211336
GSE55404_NANOG	NANOG	TF	5.3484955274029083e-20	0.5214527626075431	16.596907222293922	0.0	0.5601031349192401	inf
GSE125116_SMAD4	SMAD4	TF	2.0335925757486238e-29	0.5495705540716621	26.016874911574135	0.0	0.6020025317491319	inf
GSE42474_MED1	MED1	Co-factors	2.517620646142245e-55	0.534975854205737	51.924148567842536	0.0	0.6094223412532829	inf
GSE74112_SOX2	SOX2	TF	0.000173213597752	0.5044177279924836	1.0865568769107827	0.0	0.5399323936028972	inf
GSE51522_CREBBP	CREBBP	Co-factors	6.587778832051642e-25	0.5160217292751244	21.506399848854315	0.0	0.5749283833872931	inf
GSE44286_NANOG	NANOG	TF	9.931497348942129e-09	0.5080156087001961	5.328124128253293	0.0	0.5460446474223859	inf
GSE59378_SOX2	SOX2	TF	5.268230803259691e-25	0.5630219429226205	21.6034740659439	5.099346572816114e-182	0.563638756872923	178.61762432983116
GSE89929_RNF2	RING1B	Polycomb	0.0	0.5524401620432094	inf	0.0	0.6152063737974708	inf
GSE71883_DZIP3	DZIP3	Other	1.7358703283013382e-16	0.5182264666061646	13.085621579554529	0.0	0.6042718886778338	inf
GSE134387_CTNNB1	CTNNB1	Co-factors	1.1184759961613565e-50	0.5204392409908674	47.276512191210884	0.0	0.5690286310478754	inf
GSE101800_ZBTB2	ZBTB2	TF	0.0	0.574091207414473	inf	0.0	0.6303774192104915	inf
GSE122239_ETV5	ETV5	TF	0.0031444527080769	0.5439736311536861	-0.17240620815165822	1.217054295347551e-70	0.6058664862779225	67.23982890581121
GSE74055_MED23	MED23	Co-factors	8.867357364124484e-11	0.5246389340614563	7.377344647905845	0.0	0.5892165462944021	inf
GSE39610_MECP2	MECP2	TF	7.854710653981968e-13	0.5234322995952773	9.430008667810254	0.0	0.5763726231464529	inf
GSE22341_CHD7	CHD7	Co-factors	3.3444198937870397e-18	0.520862415501048	14.80081806115709	0.0	0.5430555981203667	inf
GSE19019_NR5A2	NR5A2	TF	0.0110548975233716	0.5146534530986827	-0.7184158618505982	0.0	0.583577260191182	inf
GSE57700_SALL4	SALL4	TF	2.836364740370157e-20	0.5322952477676353	16.87237678136023	4.0752631447421766e-266	0.5444992745747094	262.71498320235315
GSE80049_DPF2	DPF2	Co-factors	7.530970574259616e-68	0.5662315588551214	64.44828790857515	0.0	0.5925671537514335	inf
GSE64008_CBX7	CBX7	Polycomb	1.598914529882699e-122	0.5931551240728992	119.12131361014535	0.0	0.6165781062296427	inf
GSE87820_SS18	SS18	Co-factors	3.908625709679265e-17	0.552052035584868	13.73311477491428	3.645618645318621e-198	0.5699433191024078	194.76336762250656
GSE87820_POU5F1	POU5F1	TF	1.600642869357433e-24	0.5261951206315855	21.120844415018595	0.0	0.5360984814731796	inf
GSE87820_SMARCA4	SMARCA4	Co-factors	3.8589164726366274e-07	0.5423757296073564	3.738673481018751	1.0686993481304669e-127	0.5755909580016034	124.29628331477623
GSE26680_ATF7IP	ATF7IP	Co-factors	2.7176412599324065e-45	0.5480351840456634	41.89094673177903	0.0	0.5597764251248087	inf
GSE116704_SP1	SP1	TF	1.626180823730882e-110	0.5852030473508083	107.11397002379613	0.0	0.6369105132720889	inf
GSE57092_CBX5	CBX5	Repressive	0.6747769518540213	0.4974407125009661	-2.50402138084701	5.505603733441046e-37	0.5300133132539037	33.58433390948296
GSE85062_POU5F1	POU5F1	TF	0.0	0.5872552495911724	inf	0.0	0.6255984558789961	inf
GSE84899_CDX2	CDX2	TF	1.0519826312578352e-08	0.5152566413098828	5.303130289797273	0.0	0.547780793669165	inf
GSE113913_POU5F1	POU5F1	TF	4.716172087589905e-52	0.5546565825229434	48.65154921565357	0.0	0.5710610973091649	inf
GSE22562_MED12	MED12	Co-factors	2.2669148665468282e-37	0.5948462669856441	33.969703648656264	0.0	0.621244167088322	inf
GSE122715_USF1	USF1	TF	6.948015738078572e-66	0.5266486223732648	62.483278065757574	0.0	0.5967171372165384	inf
GSE22562_MED1	MED1	Co-factors	5.7214825508792106e-24	0.6173725028636742	20.567630281476195	1.932579338795981e-186	0.6450103499889706	183.03900152707595
GSE59378_POU5F1	POU5F1	TF	1.306137579020125e-13	0.5744578680620962	10.209149934495912	2.1815750336999352e-72	0.5660385893562908	68.98636870443697
GSE36030_MAFK	MAFK	TF	0.0300724570092487	0.4975871328031607	-1.1530300534398021	0.0	0.54882555513862	inf
GSE97701_EP300	EP300	Co-factors	5.194816427533268e-10	0.5736736496022927	6.609568654032698	4.243712241372118e-56	0.5781828679644331	52.69739293177586
GSE59378_MED12	MED12	Co-factors	8.349597816666052e-11	0.6147442143432253	7.4034733023665185	1.4574212065990598e-39	0.5873028268747363	36.16155377470883
GSE117287_MBD3	MBD3	TF	1.6979349337353686e-48	0.5294917303863236	45.095217815557504	0.0	0.5921594438046021	inf
GSE46536_EZH2	EZH2	Polycomb	1.8950132473664276e-184	0.6913929053584751	181.04752660894857	0.0	0.677735129656415	inf
GSE67580_SUZ12	SUZ12	Polycomb	9.24929417639345e-55	0.7147659052188907	51.35903026673864	0.0	0.7007589334817076	inf
GSE22562_SMC3	SMC3	Cohesin	4.9494766029670464e-123	0.5409961857398546	119.63057958365418	1.8981456248636093e-144	0.5171217790262138	141.04680933101886
GSE39815_TFE3	TFE3	TF	7.860087880468492e-08	0.5156305412491793	4.429711457524412	0.0	0.5740543444037021	inf
GSE27841_RCOR1	RCOR1	TF	1.445659233258681e-18	0.5299125284090961	15.165072924917965	1.4021626218668608e-302	0.5480848985683994	299.17834047353193
GSE51522_THAP11	THAP11	TF	2.5483081539573642e-51	0.5876397411380672	47.91888691539822	0.0	0.6210896390014057	inf
GSE84899_TBR1	TBR1	TF	0.3778920486469486	0.5070725412667908	-2.25222889461544	8.064357942445622e-85	0.5612578095590357	81.41856906325363
GSE55404_TGIF1	TGIF1	TF	1.8297437543853042e-30	0.5088330083242184	27.062748585842478	0.0	0.5859349739290834	inf
GSE22562_SMC1A	SMC1A	Cohesin	1.3497717436574038e-76	0.5391892574064757	73.19487852695342	1.8329963839226223e-75	0.514911336866898	72.06197725106156
GSE74547_CBFA2T2	CBFA2T2	Co-factors	0.1818427373536825	0.5115690934249408	-1.9345571011177891	3.666379791442286e-89	0.5669384242386228	85.76090140878753
GSE39263_ZFP143	ZFP143	TF	5.33092183132802e-41	0.5272647866463724	37.59833654486174	0.0	0.5836576657741055	inf
GSE51522_MBD3	MBD3	TF	0.0019519140669854	0.534200043256926	0.03467816532472941	1.0632113416415642e-70	0.5829334247574283	67.29851925853399
GSE57700_SALL1	SALL1	TF	5.256971912472861e-07	0.5634620651487788	3.60440320263384	2.1539942520248712e-24	0.5471272951971049	20.991894319221867
GSE63282_PKNOX1	PKNOX1	TF	3.630265050358004e-43	0.5574446160462907	39.765200524665296	0.0	0.5912899557273124	inf
GSE70486_SMAD2-3	SMAD2-3	TF	0.0001352943428593	0.5812298599465817	1.1938592216915707	5.766309587983091e-28	0.5875779812726589	24.56424090370335
GSE56839_NFYB	NFYB	TF	1.686420062426035e-61	0.5527948307425936	58.09817309913279	0.0	0.6091479983358008	inf
GSE56839_NFYC	NFYC	TF	1.812978071068778e-58	0.5493095029886225	55.066746308156986	0.0	0.6051014127767149	inf
GSE66025_HDAC1	HDAC1	Co-factors	1.976959337775227e-09	0.5474503427263531	6.0291411224530425	3.0159953312227942e-211	0.5997136726929722	207.84570819435416
GSE59378_SIM2	SIM2	TF	2.974308690658159e-21	0.5557044926620663	17.85175281918778	1.5457405682867544e-267	0.576868324406339	264.13600225403695
GSE48372_PRDM4	PRDM4	TF	0.062217368781981	0.5123643242212009	-1.4687727812676594	9.746945340394464e-209	0.5807867295558163	205.33627032865786
GSE102517_POU5F1	POU5F1	TF	0.021904999743534	0.5325638302911974	-1.0154043931672412	1.893114364297464e-38	0.5644454189406849	35.04796200848748
GSE134669_SMARCA4	SMARCA4	Co-factors	0.466030080119138	0.5180454129895076	-2.3432750900633237	2.800136387642224e-08	0.5509750879409611	4.877959674006447
GSE113334_MYC	MYC	TF	8.224845868445125e-10	0.6018484913308496	6.410011091133912	4.108904339601036e-94	0.6564671903058389	90.71141282879783
GSE85028_DIDO1	DIDO1	Other	1.3234724818773997e-18	0.6085916961314156	15.203423943540228	1.2505754528095953e-114	0.6467581649824302	111.22802895947693
GSE44242_CBX3	CBX3	Repressive	1.5627784392678505e-07	0.5238463044502387	4.13124144837286	0.0	0.6026852068038794	inf
GSE80049_SSRP1	SSRP1	TF	0.0011366387009427	0.5666013471120706	0.26951642018789684	0.0006955997754977	0.5264896868368066	0.4827794260984569
GSE103053_NANOG	NANOG	TF	1.1669803945947557e-12	0.5647998479028365	9.258075299352925	2.2581529722649257e-44	0.5480334054530873	40.97138550061023
GSE84760_GLI2	GLI2	TF	0.0092678825772018	0.4771424235059917	-0.6418416634392234	1.6232821831597603e-98	0.5779234862299965	95.11474483731841
GSE41903_TRIM28	TRIM28	Repressive	0.7196825912578242	0.5056194223779006	-2.53200213819798	5.228294624824017e-20	0.5588106621002391	16.60677880630433
GSE77115_AFF3	AFF3	TF	1.1862474029388076e-75	0.5376971421587159	72.25096358463028	0.0	0.5685111909465878	inf
GSE54052_CBX8	CBX8	Polycomb	4.9223409221358976e-12	0.5922964537365961	8.632967169546987	4.182349744678992e-111	0.6441819997911659	107.70371851183432
GSE129673_KLF4	KLF4	TF	0.9630502690031464	0.49931831456979	-2.6585100976244322	3.186923102383232e-40	0.580728914866356	36.821767274801175
GSE85062_POU2F1	POU2F1	TF	0.0010266490035912	0.5592416946787646	0.31371686927575365	3.484432728782422e-54	0.6204577856193207	50.783006774909246
GSE55404_HDAC1	HDAC1	Co-factors	4.277190285399071e-07	0.5038786618615643	3.6939802875042043	0.0	0.5746220615843647	inf
GSE33346_RAD21	RAD21	Cohesin	2.285540488790351e-173	0.5230885169303439	169.96614993995823	0.0	0.5162390514598325	inf
GSE36561_STAG1	STAG1	Cohesin	3.5464963708831847e-249	0.527592950035461	245.77533933948936	0.0	0.5151052157894878	inf
GSE36561_STAG2	STAG2	Cohesin	5.268099499047441e-185	0.5240253666989397	181.60348489033782	0.0	0.5167521706211247	inf
GSE96107_CTCF	CTCF	Cohesin	3.1721452117141715e-38	0.5117130569666252	34.82378579940518	0.0	0.5188267447862165	inf
GSE74055_CTCF	CTCF	Cohesin	1.5921335334584878e-115	0.519154402153058	112.12315936972226	0.0	0.5163940395322085	inf
GSE77115_ZFP281	ZFP281	TF	2.6481953866232165e-12	0.4944140854854384	8.902188834611646	0.0	0.598952073951531	inf
GSE80280_NANOG	NANOG	TF	1.2480298753044574e-50	0.4863647525993792	47.228913877662116	0.0	0.5623225749446654	inf
GSE88789_EP300	EP300	Co-factors	1.1573522157930162e-176	0.4743212565244865	173.2616733118082	0.0	0.5839641934448003	inf
GSE90893_NANOG	NANOG	TF	5.048995804064242e-79	0.4852594488865327	75.62193384948421	0.0	0.5385580718647885	inf
GSE24841_TET1	TET1	Repressive	6.671160849602465e-17	0.493218974217872	13.500937447128178	0.0	0.5930786309947231	inf
GSE53233_TCF12	TCF12	TF	7.030300306019811e-127	0.4736088882608186	123.47816498254085	0.0	0.5851108041326615	inf
GSE60699_HEY1	HEY1	TF	2.4323561441519068e-71	0.563868498942714	67.93911169486383	0.0	0.6071044113075222	inf
GSE48122_REST	REST	Repressive	0.0139188115680757	0.5201733435612652	-0.8184632961660481	3.776084954286393e-114	0.5755779418763526	110.74809710277738
GSE24841_SIN3A	SIN3A	Repressive	0.0	0.5747294648083261	inf	0.0	0.6246629218644887	inf
GSE34483_RBBP5	RBBP5	Co-factors	0.0	0.5761648144928776	inf	0.0	0.6269663127351127	inf
GSE44644_EZH2	EZH2	Polycomb	0.0	0.5727637517226126	inf	0.0	0.611461750136989	inf
GSE27841_KDM1A	KDM1A	Co-factors	1.0101882066744777e-107	0.4821574052193051	104.32073656517703	0.0	0.5803293983822996	inf
GSE19365_SUZ12	SUZ12	Polycomb	0.0	0.5859085021409468	inf	0.0	0.6167463440650034	inf
GSE58019_SUZ12	SUZ12	Polycomb	0.0	0.5649218532343478	inf	0.0	0.6133508766043804	inf
GSE40860_KDM2B	KDM2B	Polycomb	2.872699439668946e-256	0.5270884639326608	252.86684866958126	0.0	0.60639658361011	inf
GSE55782_POLR2A	RPB1	Co-factors	0.0	0.583365977921846	inf	0.0	0.6225556599560949	inf
GSE40860_RNF2	RING1B	Polycomb	0.0	0.5535244343585125	inf	0.0	0.6205110126089872	inf
GSE26832_TET1	TET1	Repressive	3.475268146272447e-72	0.513712993128168	68.78415053955803	0.0	0.5918169093790242	inf
GSE95633_POLR2A	RPB1	Co-factors	0.0	0.5854077813876916	inf	0.0	0.6363621352509198	inf
GSE52619_RNF2	RING1B	Polycomb	0.0	0.5524946541609916	inf	0.0	0.6028699044743965	inf
GSE95633_INO80	INO80	Co-factors	0.0	0.5409320333891757	inf	0.0	0.6047951098980467	inf
GSE22557_NIPBL	NIPBL	Cohesin	7.095426232665766e-115	0.5176568345385936	111.47416036997825	0.0	0.5866799676192092	inf
GSE80034_NCAPH2	NCAPH2	Other	0.0	0.5519825590412074	inf	0.0	0.6198531204020454	inf
GSE26136_DPY30	DPY30	Co-factors	0.0	0.5483443708468789	inf	0.0	0.6069743727110742	inf
GSE55782_TAF9B	TAF9B	Co-factors	1.13118758752357e-161	0.5416160533726394	158.2716042282793	0.0	0.5717702877760901	inf
GSE37930_KDM2B	KDM2B	Polycomb	2.3998001747841976e-52	0.5118711521200797	48.944963778634566	0.0	0.5861840635953052	inf
GSE93536_CXXC1	CFP1	Co-factors	0.0	0.5964051283410695	inf	0.0	0.6467595421236775	inf
GSE22303_TBP	TBP	Co-factors	0.0	0.5456237576667998	inf	0.0	0.6073759246069782	inf
GSE28332_KDM4C	KDM4C	Co-factors	0.0	0.5717056033168292	inf	0.0	0.6172246978425596	inf
GSE55338_SPI1	SPI1	TF	0.0	0.5590305882533325	inf	0.0	0.6147965565843339	inf
GSE53768_UTF1	UTF1	Co-factors	3.5609517734141895e-21	0.4914447898898311	17.773572767273397	0.0	0.6055912460458316	inf
GSE95633_BTAF1	BTAF1	Co-factors	2.8680822861591444e-97	0.5160333106744366	93.867547252046	0.0	0.589309577537948	inf
GSE58113_DPPA2	DPPA2	Co-factors	1.0849205402362184e-19	0.5068638263229465	16.289740927714167	0.0	0.5993702955986775	inf
GSE69140_POLR2A	RPB1	Co-factors	0.0	0.5472224664910121	inf	0.0	0.6121063759890188	inf
GSE98063_POLR2A	RPB1	Co-factors	1.7066603259166074e-130	0.519389379457433	127.09299176653603	0.0	0.597717069652644	inf
GSE94364_POLR2A	RPB1	Co-factors	2.6638675829438983e-79	0.5145941369256198	75.89962622638633	0.0	0.5876447814698804	inf
GSE69140_HEXIM1	HEXIM1	Repressive	2.2844810261828065e-141	0.5194428510048447	137.96635130389973	0.0	0.6012779765752756	inf
GSE22557_MED1	MED1	Co-factors	3.5460106717389594e-51	0.5118164795443753	47.775398820983646	0.0	0.5888440251333111	inf
GSE73692_PRDM15	PRDM15	TF	3.757631320533257e-47	0.5108393682556083	43.75022469214925	0.0	0.6054505024743777	inf
GSE70661_POLR2A	RPB1	Co-factors	0.0	0.5342022540263485	inf	0.0	0.6085900770582898	inf
GSE53233_SMAD2/3	SMAD2/3	TF	4.980600951351544e-16	0.4936226247767716	12.627857112062728	0.0	0.5786599616895577	inf
GSE38148_ELL3	ELL3	Co-factors	1.0909304786357454e-134	0.5294758381467093	131.28734178393222	0.0	0.5803282634278034	inf
GSE36561_POLR2A	RPB1	Co-factors	6.3851644031160265e-242	0.5265243731196209	238.5199667754471	0.0	0.602664349078359	inf
GSE34518_POLR2A	RPB1	Co-factors	1.0104104566846586e-141	0.5196729839135409	138.3206410272009	0.0	0.5959852644214585	inf
GSE58019_POLR2A	RPB1	Co-factors	1.7377045827428308e-21	0.5072698415243038	18.085162912805263	0.0	0.597919442323465	inf
GSE33346_NCAPD3	NCAPD3	Other	6.2117226710527496e-176	0.5239061707504094	172.53192680131065	0.0	0.584860229122509	inf
GSE69140_DDX21	DDX21	Other	2.091510425952289e-109	0.5168039567422535	106.00467882542932	0.0	0.5904443966027438	inf
GSE30267_POLR2A	RPB1	Co-factors	0.0	0.53887140169561	inf	0.0	0.6050949911592269	inf
GSE64188_POLR2A	RPB1	Co-factors	3.0153882454893074e-99	0.5164078324230998	95.84579562171858	0.0	0.5980113578364606	inf
GSE98140_KMT2D	KMT2D	Co-factors	6.75454004299927e-61	0.5123816528952482	57.495543078604136	0.0	0.5997565400232967	inf
GSE43229_SUPT5H	SUPT5H	Co-factors	0.0	0.5469248220256381	inf	0.0	0.6123170601275371	inf
GSE30959_TAF3	TAF3	Co-factors	4.357610400843969e-199	0.5237808225883316	195.68589046041188	0.0	0.5928421536440786	inf
GSE22557_MED12	MED12	Co-factors	0.0008573208756413	0.5025157767679965	0.3919954603978806	0.0	0.5788679321562208	inf
GSE59828_POLR2A	RPB1	Co-factors	0.0	0.5394807640553568	inf	0.0	0.6066220791511241	inf
GSE95633_MED1	MED1	Co-factors	5.141076314153028e-07	0.4961780515609169	3.6140848086786472	0.0	0.575944329568606	inf
GSE58414_POLR2A	RPB1	Co-factors	1.709139989269849e-146	0.4805423464566298	143.09236122364646	0.0	0.589147239660625	inf
GSE99022_KDM1A	KDM1A	Co-factors	9.221502745185637e-75	0.4852135496880772	71.36033715938404	0.0	0.582735419772105	inf
GSE56098_POU5F1	POU5F1	TF	9.281611490051748e-156	0.4744425879566584	152.35751547350907	0.0	0.5727786521132419	inf
GSE33346_POLR2A	RPB1	Co-factors	0.910613302260319	0.4999160438121678	-2.634195130940223	0.0	0.5871587265959752	inf
GSE29184_CTCF	CTCF	Cohesin	2.4824007089105667e-174	0.5216661074163442	170.9302669726626	0.0	0.5277869075827798	inf
GSE98140_KMT2B	KMT2B	Co-factors	2.6455100474849733e-308	0.4691064417703726	304.90262944396716	0.0	0.5856605830457211	inf
GSE69592_SOX2	SOX2	TF	7.085500844126354e-09	0.5304350055957099	5.474768305151169	5.852546257816899e-52	0.5293669736000747	48.55779400426897
GSE66830_EP300	EP300	Co-factors	1.8151008962191965e-22	0.5383561071653157	19.066238088042486	0.0	0.5593000114888784	inf
GSE56312_SOX2	SOX2	TF	8.962833469381712e-09	0.5048547933543955	5.372693532012476	0.0	0.5466169747660236	inf
GSE36561_BRD4	BRD4	Co-factors	9.438111589041993e-24	0.5078187344085476	20.35025375145777	0.0	0.5683443921218452	inf
GSE34093_CTCF	CTCF	Cohesin	1.2331085530989307e-276	0.5302700563285075	273.23413754914117	0.0	0.5227118620272097	inf
GSE39502_CTCF	CTCF	Cohesin	2.813733523371188e-210	0.5247393364398975	206.87585589438285	0.0	0.51989954891139	inf
GSE98671_CTCF	CTCF	Cohesin	1.4523149856303138e-163	0.521276283262352	160.16307804063538	0.0	0.5173307974463361	inf
GSE24030_CTCF	CTCF	Cohesin	1.1240583083734518e-101	0.5210873331398437	98.27435001924975	2.8402233182885205e-180	0.5104727335021731	176.87178637059282
GSE69099_TAL1	TAL1	TF	0.0944067032960185	0.5114032827118411	-1.6498639729714177	1.067258472435034e-96	0.5551950120343052	93.2968692481243
GSE69099_FLI1	FLI1	TF	2.40336107419178e-119	0.5398009819346603	115.944319836378	0.0	0.5910075531999103	inf
GSE47082_TAL1	TAL1	TF	0.0042770479669974	0.5087397981291661	-0.306005261624847	0.0	0.5471224778169484	inf
GSE98988_POLR2A	RPB1	Co-factors	2.7578278333728306e-184	0.5230853655416533	180.8845717088618	0.0	0.6038259150020336	inf
GSE92846_KLF4	KLF4	TF	1.2596847597395087e-285	0.5414229292312032	282.22487698417234	0.0	0.6095832479200362	inf
GSE28247_POLR2A	RPB1	Co-factors	0.0	0.535413069733601	inf	0.0	0.6049781816086198	inf
GSE60027_POLR2A	RPB1	Co-factors	0.0	0.5324971813664544	inf	0.0	0.6074508187413897	inf
GSE99022_KMT2B	KMT2B	Co-factors	9.13386662891155e-114	0.519481503911281	110.36448419343533	0.0	0.5940006027518362	inf
GSE89599_SOX2	SOX2	TF	7.834898280044609e-13	0.5109424905463064	9.431105496836915	0.0	0.5379734881306026	inf
GSE55263_CHRM2	CHRM2	Other	0.2334584055578196	0.5184941571915013	-2.0430706558504728	6.633760269729504e-19	0.5534515969268962	15.503379086292597
GSE43565_CTNNB1	CTNNB1	Co-factors	1.6511169705479408e-46	0.5180565770159021	43.10736101806235	0.0	0.5446787321555376	inf
GSE77440_TRIM28	TRIM28	Repressive	1.664252831043808e-06	0.5132160520541585	3.103919554863862	0.0	0.5689093329646272	inf
GSE22557_CTCF	CTCF	Cohesin	4.211820871855986e-173	0.5450888294731222	169.70066896683866	0.0	0.5250927741607763	inf
GSE60749_POLR2A	RPB1	Co-factors	0.0	0.5707742128945761	inf	0.0	0.6226381323433366	inf
GSE38148_POLR2A	RPB1	Co-factors	0.0	0.5725008510723574	inf	0.0	0.6221298157670072	inf
GSE64489_POLR2A	RPB1	Co-factors	0.0	0.5668338259049962	inf	0.0	0.6168779175348201	inf
GSE61188_POLR2A	RPB1	Co-factors	0.0	0.5456370794867916	inf	0.0	0.5992715213242621	inf
GSE77115_POLR2A	RPB1	Co-factors	0.0	0.545183329958431	inf	0.0	0.6002750919468515	inf
GSE20485_POLR2A	RPB1	Co-factors	0.0	0.5549238612827534	inf	0.0	0.6159890000541705	inf
GSE65695_FGFR1	FGFR1	Co-factors	0.0	0.5645952794650242	inf	0.0	0.6188003643492387	inf
GSE73426_POLR2A	RPB1	Co-factors	0.0	0.5837361199437643	inf	0.0	0.6246630343829503	inf
GSE47949_POLR2A	RPB1	Co-factors	0.0	0.534380849405343	inf	0.0	0.5939295453789823	inf
GSE48253_POLR2A	RPB1	Co-factors	0.0	0.5694104573427308	inf	0.0	0.6244935385314653	inf
GSE53797_NSL1	NSL1	Other	1.4329623601601274e-240	0.5843374755067218	237.1689040763941	0.0	0.6045038391129003	inf
GSE72853_POLR2A	RPB1	Co-factors	0.0	0.5828270208003317	inf	0.0	0.6322760107288915	inf
GSE30959_POLR2A	RPB1	Co-factors	0.0	0.5965191042489043	inf	0.0	0.6432622635442019	inf
GSE75301_POLR2A	RPB1	Co-factors	0.0	0.5507708619700721	inf	0.0	0.6050834139383969	inf
GSE54978_T	T	TF	7.240145685509118e-32	0.5644211655365198	28.465391554145686	0.0	0.6048389835234448	inf
GSE39263_ZNF143	ZNF143	Co-factors	1.8329387426969518e-52	0.5371216626445575	49.06199090829519	0.0	0.5865163903439867	inf
GSE92846_SOX2	SOX2	TF	6.99852703032993e-12	0.5487305811756528	8.48013221494988	6.882211118634855e-55	0.540528946376197	51.487410868360044
GSE59378_CHRM2	CHRM2	Other	1.3585426677574456e-18	0.5372587318653985	15.192065576404769	0.0	0.5618525187033333	inf
GSE33346_TMPRSS4	TMPRSS4	Other	2.218640728980105e-70	0.5163267439547435	66.97905187791973	0.0	0.5751586725143398	inf
GSE79699_ISL1	ISL1	TF	3.2157661942385422e-31	0.5560916686807755	27.81785439388828	0.0	0.6078076054613887	inf
GSE28455_TFAP2C	TFAP2C	TF	6.179055690479106e-71	0.5316187032989974	67.53421674982867	0.0	0.6040124146137801	inf
GSE78073_POU5F1	POU5F1	TF	4.378183778332193e-06	0.5254409377234411	2.6838448717332426	9.39503762496573e-64	0.5345751668937505	60.35224033557261
GSE34013_HOXB4	HOXB4	TF	1.149327412378819e-09	0.534720092362632	6.264695094164875	1.241600330579999e-183	0.5647095187145587	180.23115703971578
GSE35599_RARA	RARA	TF	0.1112166676557956	0.5048797510594035	-1.721031019067429	0.0	0.5761335729817817	inf
GSE28455_SOX2	SOX2	TF	0.3298273490632079	0.4980345260974842	-2.1931478049474142	0.0	0.5570327848549085	inf
GSE80049_SAP18	SAP18	Co-factors	3.225813238129875e-10	0.5627249265053365	6.816499639419892	2.104606859133994e-87	0.5792588202775172	84.00196787778634
GSE71675_PRDM14	PRDM14	TF	0.0173901148591175	0.5261269812414332	-0.9151635912003396	2.8889924120859452e-86	0.5828317923831731	82.86439245808727
GSE30959_TBP	TBP	Co-factors	3.507361626065661e-27	0.5827491837293081	23.780158313195876	1.0954393743108213e-308	0.6281911886999846	305.2855505121723
