# Supplementary material for: Ultra-long-range interactions between active regulatory elements
Source: HighWire-hosted journal article supplement (doi:10.1101/gr.277567.122), 2023-07-14
Supplement: Supplemental_Table_S2_.xlsx [file Supplemental_Table_S2_.xlsx]

## Sheet: Sheet1
Supplemental table S2
Enrichment values from the contact screen in GM12878
ID_Factor	Factor	Group	p_value_short	F_value_short	-log10_adj_p_short	p_value_long	F_value_long	-log10_adj_p_long
ENCSR000BMY_RAD21	RAD21	Cohesin	0.0	0.5352721520622664	inf	7.661599228154316e-200	0.4918830145772312	196.73546932762818
GSE97661_ZBTB2	ZBTB2	TF	3.428048009563262e-142	0.5215798146324558	139.084741862732	3.3098959072288926e-36	0.4964139706403823	33.099974422406014
ENCSR000BGY_IRF4	IRF4	TF	0.0012685727504418	0.5025353788228344	0.5164733799829504	0.0	0.511579631746135	inf
ENCSR000BQM_PML	PML	Co-factors	0.0	0.5523890667740515	inf	0.0	0.5611343094807287	inf
ENCSR514VAY_HCFC1	HCFC1	Co-factors	1.407781876112783e-88	0.5208514572785958	85.47125338852422	0.0	0.5326954678946579	inf
ENCSR839XZU_CREM	CREM	TF	6.409762101396697e-35	0.5104395151108068	31.81294684732932	0.0	0.5260595415166771	inf
ENCSR000BHJ_PAX5	PAX5	TF	0.0005362891978972	0.4972696899922896	0.8903897089309298	0.0	0.5177815274174022	inf
ENCSR000BUF_CREB1	CREB1	TF	1.110578368740542e-32	0.5104211659310645	29.574239548028228	0.0	0.5288062345347188	inf
ENCSR000BQT_TCF3	TCF3	TF	0.0001682794106298	0.4968901368768527	1.3937577759838078	0.0	0.5223101477592998	inf
ENCSR000BGZ_TCF12	TCF12	TF	0.0366998318581545	0.4983604092209532	-0.9448753162295549	0.0	0.5157084192637994	inf
ENCSR000BGS_TAF1	TAF1	Co-factors	2.7303674007046508e-307	0.5434946412103873	304.1835676682576	0.0	0.5598160052971679	inf
ENCSR000BHD_PAX5	PAX5	TF	0.5262589476812527	0.4995102284385641	-2.1014107346799076	0.0	0.5120394082074818	inf
ENCSR251OVJ_SMAD5	SMAD5	TF	0.0	0.5719577586253225	inf	0.0	0.5825880075341919	inf
ENCSR000DNM_NFYB	NFYB	TF	1.6105907373727283e-25	0.5211878443088989	22.41280356118471	0.0	0.5352863843808359	inf
ENCSR000BHK_SP1	SP1	TF	6.551456615590471e-26	0.5089570268850571	22.80345088886401	0.0	0.5245825521398939	inf
ENCSR000BJY_ATF3	ATF3	TF	4.3364311879545314e-11	0.5229024684297081	7.982656299047987	3.6892241946553126e-264	0.5472722278841332	261.05285371012496
ENCSR000DKU_MYC	MYC	TF	6.165050519306007e-161	0.5603525426012538	157.82985211853006	0.0	0.582959104475397	inf
ENCSR819ATC_MYB	MYB	TF	1.3728448436135354e-89	0.5359551764906669	86.48216730143774	0.0	0.5512700116917663	inf
ENCSR000DKV_CTCF	CTCF	Cohesin	0.0	0.5314566956938138	inf	4.105255093312074e-101	0.4943186801334432	98.00644860970121
ENCSR000DZZ_TBP	TBP	Co-factors	2.621079906996116e-165	0.5701225658997843	162.20130849711344	0.0	0.5801565731124994	inf
ENCSR000BMB_ELF1	ELF1	TF	0.3091857945074429	0.4991498869435759	-1.870430773824797	0.0	0.5194158778345678	inf
ENCSR000DZR_CHD2	CHD2	Co-factors	1.503337911499214e-120	0.5477833154518361	117.44273214855639	0.0	0.567864656330881	inf
ENCSR000BJE_SIX5	SIX5	TF	2.023776925605276e-144	0.5450041510078292	141.3136261183607	0.0	0.5579051159476364	inf
GSE97661_USF2	USF2	TF	8.468067449683797e-08	0.4948095469121837	4.692004449693403	0.0	0.5183669683776035	inf
ENCSR000BMI_SRF	SRF	TF	2.699592566049219e-73	0.5259643131812498	70.18849053474742	0.0	0.5437663209775851	inf
ENCSR000DZA_MAZ	MAZ	TF	5.99953603592956e-79	0.542239091039512	75.84167109204252	0.0	0.5632369667731054	inf
ENCSR000BGC_GABPA	GABPA	TF	1.5669748976229445e-169	0.5829894761679855	166.42472671900626	0.0	0.5757701871707991	inf
ENCSR000DRZ_CTCF	CTCF	Cohesin	0.0	0.5363638530334484	inf	3.868428492583243e-86	0.4947430879297738	83.03225418489974
ENCSR000BND_ZEB1	ZEB1	TF	1.7944919514308963e-05	0.5038828821446251	2.3658472434915163	0.0	0.5218428023874927	inf
ENCSR331HPA_GABPA	GABPA	TF	8.246148103362113e-158	0.5424406420658002	154.70353762769022	0.0	0.5512502544953638	inf
ENCSR000BKB_MEF2A	MEF2A	TF	2.1414094197286545e-66	0.5165244009335697	63.28908904955067	0.0	0.5248081188404742	inf
ENCSR000BNG_MEF2C	MEF2C	TF	2.274776888294564e-98	0.5436108605486967	95.26284995111249	0.0	0.5471575005272281	inf
ENCSR746XEG_NFXL1	NFXL1	TF	0.0124553615249482	0.5113100118728037	-0.475567579446148	3.530028861294416e-31	0.5241925986903766	28.07201050212163
ENCSR000DZN_CTCF	CTCF	Cohesin	0.0	0.5375999777565258	inf	8.920147038740294e-194	0.4921030626633068	190.66941674498995
ENCSR000AKB_CTCF	CTCF	Cohesin	0.0	0.540116946177811	inf	4.533039844194851e-81	0.4947350834408237	77.96339922188183
ERP002246_CTCF	CTCF	Cohesin	0.0	0.5453429227090547	inf	2.4466158717328375e-54	0.4951892760218775	51.23122296951779
GSE76922_CTCF	CTCF	Cohesin	0.0	0.5362792758976449	inf	7.290529118790621e-138	0.493347902360974	134.75702970938988
ENCSR000BMQ_EGR1	EGR1	TF	7.092465038419531e-50	0.5180880626968254	46.76899155462542	0.0	0.5414374494779469	inf
ENCSR987MTA_BHLHE40	BHLHE40	TF	6.243867945633805e-24	0.4920419588861418	20.824335048889846	0.0	0.5138060124060732	inf
ENCSR636MKU_BACH1	BACH1	TF	9.947422557056425e-92	0.5229713022055354	88.62207819153798	0.0	0.5424514067226855	inf
ENCSR509FWH_DPF2	DPF2	Co-factors	0.0088407094344145	0.4978840750522875	-0.3266983586578323	0.0	0.5159158607058981	inf
ENCSR706YUH_SMARCA5	SMARCA5	Co-factors	1.3278051111204964e-59	0.5137897275431119	56.49665442224443	0.0	0.5126088730415121	inf
ENCSR936XTK_ZNF143	ZNF143	Co-factors	1.9994846027392108e-24	0.5082610602354523	21.318870694140507	6.301347598398737e-218	0.5090749047827203	214.82035532122163
ENCSR828NCB_GATAD2B	GATAD2B	TF	2.4596881378342432e-21	0.5089026454727529	18.228908711592947	0.0	0.5273031950102463	inf
ENCSR278SQL_NBN	NBN	Other	4.414773970817672e-25	0.5086802527566271	21.97488028497039	0.0	0.5226092185035784	inf
ENCSR859FDL_ZNF687	ZNF687	TF	1.819351841649101e-120	0.5286557696230356	117.35987206356214	0.0	0.5455330083596794	inf
ENCSR764CZW_ZNF217	ZNF217	TF	3.3142913487868145e-85	0.5257216223983863	82.09939807508354	0.0	0.5354583465576679	inf
ENCSR841NDX_ELF1	ELF1	TF	1.142728318158798e-97	0.5190937284477166	94.56184576844369	0.0	0.526429655851234	inf
ENCSR514VYD_NR2F1	NR2F1	TF	0.0921193411397522	0.4984987140605434	-1.3445620648336603	0.0	0.5179390936871956	inf
ENCSR177VFS_MEF2B	MEF2B	TF	4.9247382452228224e-08	0.5050683038150146	4.927405606028643	0.0	0.5199909632978701	inf
ENCSR778UBR_ARID3A	ARID3A	TF	6.486656942495875e-132	0.5330802676530154	128.80776782812765	0.0	0.5471268670022253	inf
ENCSR000BRG_EGR1	EGR1	TF	1.6347172961804117e-39	0.5766502108436468	36.40634610057319	2.7743277927989533e-186	0.5721672494245494	183.1766309856919
GSE93080_MED1	MED1	Co-factors	5.175485635012285e-148	0.5252100411144968	144.90583765078543	0.0	0.5422308727117572	inf
ENCSR900XDB_ZFP36	ZFP36	Other	0.0335464908101141	0.5022361837778883	-0.9058583384517254	0.0	0.5182843175143602	inf
ENCSR000BQS_REST	REST	Repressive	2.9864358344869824e-80	0.5255932953143393	77.144635570204	0.0	0.5457858053123666	inf
ENCSR000EAC_RAD21	RAD21	Cohesin	0.0	0.5496131250137208	inf	0.0	0.4882001702661519	inf
ENCSR000BNQ_BCL3	BCL3	Co-factors	8.334260021351717e-11	0.5070889912541866	7.698921712361925	0.0	0.5223255085568019	inf
ENCSR000DZL_ZNF143	ZNF143	Co-factors	2.419359365624214e-99	0.5272264662339899	96.2360883761126	2.066518061232697e-50	0.5068993271021155	47.304549552948714
ENCSR000BHA_BCL11A	BCL11A	TF	0.1764978402065721	0.5011199547883611	-1.626950637032576	0.0	0.521233816130211	inf
GSE97661_BATF	BATF	TF	1.0023652502782904e-59	0.5249263594521724	56.6187627560425	1.6968264357218455e-09	0.5034048435346364	6.390151336632618
ENCSR009MBP_HSF1	HSF1	TF	1.9319318493372165e-80	0.5423494807796858	77.33379695607373	0.0	0.553267597582892	inf
ENCSR000DZJ_BHLHE40	BHLHE40	TF	2.7527532183625685e-54	0.5243426855866323	51.1800214792261	0.0	0.5480430723225677	inf
ENCSR000BJD_RXRA	RXRA	TF	3.7826022931452953e-122	0.5353194292404799	119.04199807678211	0.0	0.5435702756859828	inf
ENCSR000DZF_MAX	MAX	TF	3.0273442949593762e-58	0.5592244856248588	55.138726942915554	0.0	0.5825389422983757	inf
ENCSR293QAR_MTA2	MTA2	TF	0.8522974871007222	0.5001513417779286	-2.3108024496896977	0.0	0.5130348687082434	inf
ENCSR552XSN_MLLT1	MLLT1	Co-factors	1.6780373785520294e-23	0.5081352273624106	20.394987127708653	0.0	0.5157855742122791	inf
ENCSR387QUV_RELB	RELB	TF	1.1630551175890213e-05	0.5034370361610533	2.554188461704777	7.044355074612629e-299	0.5099886921395869	295.7719475195879
ENCSR437GBJ_NFATC3	NFATC3	TF	2.0950875995376808e-55	0.5133236260866398	52.298586571940504	0.0	0.5209310243765969	inf
ENCSR412QBS_TARDBP	TARDBP	Other	7.892391468149946e-35	0.5096197983982059	31.72258013986322	2.0834211239326787e-134	0.5066658738485251	131.3010116951026
ENCSR739IHN_TBX21	TBX21	TF	5.655962675799914e-08	0.5042950875447997	4.8672822234379565	0.0	0.5109620478771953	inf
ENCSR205SKQ_YBX1	YBX1	TF	0.5047197366445089	0.5036367441094297	-2.083261529500985	5.422233103196251e-44	0.5306889335943618	40.88561057421107
ENCSR849WCQ_ASH2L	ASH2L	Co-factors	1.6982316327728587e-70	0.5171954113545323	67.38979183211295	0.0	0.537741419799433	inf
ENCSR813DCK_SMAD1	SMAD1	TF	1.8981602999928823e-112	0.538845396066836	109.34145587239803	0.0	0.5553685516009164	inf
ENCSR793HVL_E2F8	E2F8	TF	6.131086289050023e-270	0.5413180804482839	266.83225132984757	0.0	0.5461199045586269	inf
ENCSR664POU_RELA	RELA	TF	8.995149407793544e-101	0.5231691125065697	97.66578037699466	0.0	0.5355760157397267	inf
ENCSR835XKS_TRIM22	TRIM22	Co-factors	2.091529742740208e-248	0.526613145460847	245.29932471341377	1.92248418996466e-05	0.4988599490147622	2.3359259813308366
ENCSR000DZQ_EBF1	EBF1	TF	0.0020279178180395	0.5044272761721639	0.3127384071809146	4.393479849224088e-247	0.5175187705666016	243.97698011944615
ENCSR212YKD_SKIL	SKIL	Co-factors	1.1413469018837839e-137	0.5210521217109777	134.56237109399632	0.0	0.5165314259278042	inf
ENCSR014YCR_ATF7	ATF7	TF	0.2686430475291915	0.4991296732649905	-1.8093868472387695	6.37315829390855e-256	0.5092419526513399	252.8154340528452
ENCSR711XNY_PKNOX1	PKNOX1	TF	6.97630156536384e-08	0.495663915772193	4.776163512662232	0.0	0.5141743863213992	inf
ENCSR542FLV_ZBTB33	ZBTB33	TF	2.7941554079117325e-61	0.5291166422168986	58.173538200847545	0.0	0.5427655690892109	inf
ENCSR681NOM_CEBPB	CEBPB	TF	1.0521455504138073e-11	0.5285058184623103	8.5977129354202	8.346255116681642e-147	0.5418284743065961	143.69829710280203
ENCSR637QAM_TRIM22	TRIM22	Co-factors	9.97150657848893e-184	0.5251613856399305	180.621027978182	0.0	0.5128048849991236	inf
ENCSR000BGR_PBX3	PBX3	TF	0.127363998273887	0.5013695002650225	-1.4852579259072616	0.0	0.5216609035828444	inf
ENCSR482TWQ_RAD51	RAD51	Other	6.840804209474961e-38	0.5139294826218449	34.784681597619944	0.0	0.5246316139169005	inf
ENCSR680UQE_IKZF2	IKZF2	TF	9.956145602584864e-13	0.4942704808197734	9.621697519012267	0.0	0.5132748670896793	inf
ENCSR189YYK_ZBTB40	ZBTB40	TF	5.653001967256004e-135	0.5307171673386842	131.8675096216929	0.0	0.5455081934042564	inf
ENCSR117KWH_ZNF207	ZNF207	TF	1.1986291351590657e-167	0.5329389701266867	164.54110392837444	0.0	0.5441468177818837	inf
ENCSR439WAF_E4F1	E4F1	TF	0.1985365344747609	0.501836225833513	-1.678051678557894	0.0	0.5341354886189669	inf
ENCSR860UHK_CBFB	CBFB	TF	1.342348297684006e-115	0.5224784367433135	112.49192354190669	0.0	0.5371574138355095	inf
ENCSR933EYC_HDAC6	HDAC6	Co-factors	2.8201789107006536e-35	0.5232300606097239	32.169512097676346	0.0	0.546870376471932	inf
ENCSR016UEH_TARDBP	TARDBP	Other	5.980337001088267e-157	0.5578934913690854	153.84306310045562	0.0	0.562451252545389	inf
ENCSR000BRH_MTA3	MTA3	TF	4.178613888040708e-108	0.5290799242944876	104.99875651493619	0.0	0.538686073054783	inf
ENCSR000BQL_NFATC1	NFATC1	TF	4.311847992437471e-48	0.5190569330555137	44.985125316223176	0.0	0.5334205968252963	inf
ENCSR330OEO_HDAC2	HDAC2	Co-factors	2.6573643407950987e-91	0.54697046251397	88.19533765538391	0.0	0.570041495067298	inf
ENCSR000DZI_MXI1	MXI1	TF	1.3814160885893795e-133	0.5661464445736705	130.47946424860112	0.0	0.585388678544044	inf
ENCSR784VIQ_NR2C1	NR2C1	TF	1.302546404315305e-71	0.5399287571136462	68.50499555393365	0.0	0.5553312104560255	inf
ENCSR000BKA_ETS1	ETS1	TF	3.555306859719315e-147	0.5491274086753466	144.0689116675035	0.0	0.5643935011469584	inf
ENCSR412YGM_ZSCAN29	ZSCAN29	TF	6.896028191288837e-28	0.5538734470698675	24.78118973005176	8.81950928982176e-167	0.5566694025476661	163.67434433626897
ENCSR000BHC_ZBTB33	ZBTB33	TF	1.1587784225666612e-74	0.5517874190802265	71.5557883586116	0.0	0.565263425325709	inf
ENCSR000BGI_USF1	USF1	TF	0.0483405485643893	0.5039935996497091	-1.0645228161476457	0.0	0.5322220450072559	inf
ENCSR974OFJ_KLF5	KLF5	TF	1.3187413291545312e-143	0.5434842105953014	140.49962914116338	0.0	0.5634069136293257	inf
ENCSR822AHX_IKZF2	IKZF2	TF	0.0007333054938881	0.5029304389059402	0.7545038195680485	0.0	0.5198815286875975	inf
GSE93080_NIPBL	NIPBL	Cohesin	0.0	0.5511111329988175	inf	0.0	0.5396022890497509	inf
ENCSR000DZP_SMC3	SMC3	Cohesin	0.0	0.5583360457487216	inf	0.0	0.4835117789215367	inf
ENCSR897MMC_JUNB	JUNB	TF	0.0112662548223039	0.5021892365020989	-0.4319908116775887	0.0	0.5164574906407126	inf
GSE97661_BATF3	BATF3	TF	4.217560011586851e-55	0.5351492268018013	51.994727487414764	0.0	0.5445021812109146	inf
ENCSR000BRN_NFIC	NFIC	TF	5.1959058846611824e-43	0.5127211430669881	39.904127482350546	0.0	0.5250681988301493	inf
GSE97661_ETV6	ETV6	TF	5.2228861623538967e-33	0.5130083842993023	29.901878198199118	0.0	0.5300907318190473	inf
ENCSR590KEQ_ARNT	ARNT	TF	9.118456805916214e-130	0.5374672790382752	126.65986741309416	0.0	0.5464820269142053	inf
ENCSR000EAG_RELA	RELA	TF	1.898668501489896e-63	0.5199590403746565	60.34133961268831	0.0	0.5388676682754736	inf
GSE97661_ZNF597	ZNF597	TF	1.4325701140686872e-88	0.5549745931450866	85.46367287151776	0.0	0.5573485285689549	inf
ENCSR501DKS_TCF7	TCF7	TF	1.3640905226042432e-88	0.5409634268548139	85.48494556673404	0.0	0.542414901085414	inf
ENCSR626VUC_ETV6	ETV6	TF	6.194357174293989e-56	0.5180447192427566	52.82779251458879	0.0	0.5321014230195952	inf
ENCSR332EYT_STAT1	STAT1	TF	1.9155683885186268e-70	0.5486359252962482	67.33749109676121	0.0	0.5621951013077091	inf
ENCSR072PWP_ZNF24	ZNF24	TF	2.01731545409519e-65	0.525495941738419	62.3150149427426	0.0	0.5254997064535828	inf
ENCSR173ZVL_ZNF592	ZNF592	TF	9.492004420073925e-19	0.5331048218163693	15.642430826508235	7.691555258341215e-197	0.5436841345767458	193.7337745938026
ENCSR000DYS_JUND	JUND	TF	4.319118022126101e-42	0.5430969078131082	38.98439368675819	0.0	0.5592107087809617	inf
ENCSR961PPA_ATF2	ATF2	TF	0.1223183609739425	0.4960802980251695	-1.4677028947507493	4.464279149167878e-45	0.5124797323625138	41.970037415290584
ENCSR000BQK_ATF2	ATF2	TF	1.8360354810592065e-54	0.5157059263278316	51.355907688678435	0.0	0.5298291530770923	inf
ENCSR000DZU_USF2	USF2	TF	5.2409191389021357e-11	0.5218828491284295	7.900381299177198	0.0	0.5582899287302256	inf
ENCSR000DYQ_ESRRA	ESRRA	TF	4.989706181880776e-12	0.5443466955390113	8.921713785279183	2.7017423232571954e-92	0.5538484267037141	89.18814483215304
ENCSR751CJG_CHD4	CHD4	Repressive	4.3217054950207545e-20	0.5343805489707076	16.984133589967282	0.0	0.5618998091343644	inf
ENCSR091BOQ_SUZ12	SUZ12	Polycomb	4.880527766290628e-16	0.5365646493758802	12.931321970385177	7.04062116901496e-71	0.5303072205794189	67.77217778119532
ENCSR041XML_SRF	SRF	TF	2.526862405776236e-13	0.5121353527650475	10.217207164187649	0.0	0.5281088767112684	inf
ENCSR000BHB_EP300	EP300	Co-factors	2.61313118834926e-90	0.5440093881302671	87.2026275449078	0.0	0.5609785829725339	inf
ENCSR000BGE_SRF	SRF	TF	3.966003004328371e-09	0.5273042318777156	6.021435719432035	7.335671102278137e-96	0.5375750096532635	92.75434890695519
ENCSR000DZO_NRF1	NRF1	TF	4.434286245261104e-69	0.5639684853537777	65.97296503371271	0.0	0.5787704976371074	inf
GSE97661_ZMYM3	ZMYM3	Repressive	0.2296828503072518	0.502275062690266	-1.7413398107203897	0.0	0.5328639568106728	inf
ENCSR725VFL_TCF12	TCF12	TF	1.6994058944678855e-31	0.5257792591339797	28.389491637998255	0.0	0.5430390291979253	inf
GSE97661_DRAP1	DRAP1	Co-factors	0.0	0.5698418687487046	inf	5.622305468989136e-27	0.4934888053763786	23.869874320451267
ENCSR408JQO_IRF3	IRF3	TF	3.0211569024316474e-25	0.5350100035988277	22.13961547753985	0.0	0.5551070403590118	inf
ENCSR469WII_BMI1	BMI1	Co-factors	1.0388843866857861e-33	0.5222037552149854	30.60322153894887	0.0	0.5279821648085203	inf
ENCSR000BQZ_STAT5A	STAT5A	TF	6.96196351996009e-76	0.5359376739882044	72.77705701499677	0.0	0.5384940627147166	inf
GSE97661_ZNF18	ZNF18	TF	2.5650031477051267e-123	0.5466743590982213	120.21070085588535	0.0	0.5527448955670412	inf
ENCSR000BRU_FOXM1	FOXM1	TF	1.7086914096599418e-231	0.539227167543869	228.38712512224004	0.0	0.5307451711207727	inf
ENCSR000DZD_EP300	EP300	Co-factors	4.4511651332078633e-92	0.5727237476970682	88.97131505187137	0.0	0.5802770777296963	inf
ENCSR207PFI_ZBED1	ZBED1	TF	9.150949495249604e-180	0.5496748221103316	176.65832259983358	0.0	0.5553368432599447	inf
ENCSR000DZG_EP300	EP300	Co-factors	6.351173866313009e-126	0.5731936177045414	122.81693475637489	0.0	0.5604247211899489	inf
ENCSR000DYZ_TBL1XR1	TBL1XR1	Co-factors	1.2992614171129774e-34	0.5872518221731708	31.506092216463014	9.380220059443867e-224	0.5934299940120753	220.64757573126528
ENCSR372GIN_CBX5	CBX5	Repressive	7.75884156316722e-144	0.5579814554321499	140.72999187469517	0.0	0.5514272357480083	inf
ENCSR000DYU_SREBF1	SREBF1	TF	2.4364338805700507e-43	0.5977047316277242	40.23303412820342	8.158094340394419e-107	0.5689361074902626	103.7082000350867
ENCSR000DYT_SREBF2	SREBF2	TF	3.2782922804345614e-36	0.6436497837660601	33.10414108723538	6.05691105582817e-49	0.6061350249884957	45.83753756208038
ENCSR459FTB_UBTF	UBTF	TF	2.6722450753262067e-83	0.5579451674594431	80.19291247290516	0.0	0.5726364049626074	inf
ENCSR861JUQ_FOXK2	FOXK2	TF	0.0023051459225298	0.492252407253667	0.2570903355720219	2.6235482182355823e-276	0.5354076875449639	273.2008997077753
ENCSR976TBC_IRF5	IRF5	TF	0.2490009331064309	0.4952416382376343	-1.7764122162861162	9.11806367075406e-103	0.5360692233665375	99.65988613776611
ENCSR000BGF_REST	REST	Repressive	0.0488810172423502	0.4929907824147085	-1.0693514769604766	2.081496958419034e-24	0.5137786967895732	21.3014129776766
ENCSR000EYZ_FOS	FOS	TF	9.965237744678261e-14	0.5411400882495476	10.621301093990452	2.592306623359597e-114	0.5513271549606527	111.20610238880694
GSE97661_TP73	TP73	TF	0.0002756672489427	0.5451532724048518	1.1794035861193508	2.577862519801789e-09	0.5280942477755433	6.208529006048179
ENCSR000DYX_SIN3A	SIN3A	Repressive	1.856148599032447e-65	0.5892656077160496	62.351176016385914	0.0	0.5982180667366579	inf
ENCSR342THD_BCLAF1	BCLAF1	TF	2.0958926094906564e-06	0.5861078792692779	3.2984197320284494	1.4294795261729729e-28	0.5908968228711644	25.46461081876492
ENCSR330EXS_RBBP5	RBBP5	Co-factors	6.012384908816828e-81	0.6154096235574864	77.84074198224441	0.0	0.6132198320397749	inf
ENCSR347NOB_CEBPZ	CEBPZ	TF	1.7599512709050696e-46	0.5700860713579964	43.37428811494584	2.339060471978061e-266	0.571238382215797	263.25074730847285
GSE97661_STAT2	STAT2	TF	1.2572161206788104e-53	0.5767322868973443	50.520378817157486	0.0	0.5831262541888894	inf
ENCSR000DZB_ELK1	ELK1	TF	8.223529665830697e-18	0.6033386891387716	14.704730494839476	4.4545903205197e-72	0.5902504287337613	68.97098098924636
ENCSR000DYV_MAFK	MAFK	TF	0.6167005224090476	0.490985747887643	-2.1702855580303555	0.0024757384279057	0.5197606533230852	0.2260840005405091
ENCSR000DZW_RFX5	RFX5	TF	0.0035792488827539	0.5265657438799286	0.0659968602200958	5.189193166596154e-39	0.5507816441640412	35.90468892077416
ENCSR000DZE_CHD1	CHD1	Co-factors	3.7979331477044074e-08	0.595930065654317	5.040241442394664	1.7033119119677486e-28	0.5841736636461947	25.38849457465771
GSE97661_TSC22D4	TSC22D4	TF	2.1370746931878497e-57	0.5994303200935519	54.289969056773636	4.958919205247799e-258	0.5833911908813828	254.9244017258192
ENCSR000DYR_CUX1	CUX1	TF	7.85208567727814e-08	0.6392320498994565	4.724803728572076	3.7042740651545785e-23	0.6005791972327726	20.05108564729224
ENCSR000BRX_CEBPB	CEBPB	TF	9.88357948009185e-89	0.598673096175605	85.62487449923549	0.0	0.5810005544636812	inf
ENCSR000EYV_JUND	JUND	TF	1.7571419950191304e-49	0.5522726580808288	46.37498189994534	0.0	0.5525575157558696	inf
ENCSR192AFN_PAX8	PAX8	TF	1.9366533553516027e-09	0.5604676835505009	6.332736865669643	1.7796739580158605e-74	0.5702923365715029	71.36944831283591
ENCSR000DYP_ZNF384	ZNF384	TF	1.1460926787522396e-17	0.5305188391838271	14.560569020025923	1.3505660704966276e-257	0.5454859771268814	254.4892729233005
ENCSR000DNN_NFYA	NFYA	TF	7.338787897853393e-07	0.5457113765101308	3.7541644221793073	9.081890963186546e-74	0.568341744939567	70.66161247481404
ENCSR000EUM_YY1	YY1	TF	0.0732560763994106	0.5271074399652617	-1.2450548958201284	7.818589503356985e-28	0.5649400838876155	24.72666034616976
ENCSR000EUJ_IKZF1	IKZF1	TF	1.5571703003451632e-09	0.5920144491912829	6.427452646391007	5.401952766654593e-61	0.598534185555156	57.887237975784416
ENCSR000DYY_E2F4	E2F4	TF	1.7456738061539006e-13	0.5917963433278192	10.377825662917779	6.116997066726716e-67	0.5867897857189767	63.83325048604704
ENCSR597VGC_ETV6	ETV6	TF	0.0050117022163289	0.4873807900267642	-0.08019650003387749	1.0222422348728994e-56	0.5358260156462441	53.61023493802476
GSE50893_CTCF	CTCF	Cohesin	1.8318625043203378e-23	0.5092272020602338	20.35689588494777	2.1671163541438788e-76	0.4942495290038191	73.28390652873782
GSE50893_STAG1	STAG1	Cohesin	7.207110485842542e-84	0.5179468891356015	80.76202757839296	1.3171699723658355e-271	0.4890771268835051	268.5001469367833
GSE31477_MAZ	MAZ	TF	6.917677748015391e-111	0.5178993438418176	107.77982843124295	0.0	0.5121777781089978	inf
GSE31477_SMC3	SMC3	Cohesin	7.325967231257741e-293	0.5289680207561777	289.75492378653644	1.2220552462696677e-272	0.4905844361325344	269.53269791849664
GSE32465_RAD21	RAD21	Cohesin	2.0595018896744077e-167	0.5240496017595456	164.30602656351343	1.5084521005389082e-129	0.492926029549068	126.44125723416646
GSE53366_EP300	EP300	Co-factors	1.9218489861949495e-20	0.4926825644393643	17.336069499325735	6.963407514162462e-21	0.5025008683442134	17.77696694648589
GSE19622_CTCF	CTCF	Cohesin	5.765297473122329e-269	0.5279848444696961	265.8589670377067	9.353472257179576e-129	0.493490699692748	125.64881589584404
GSE31477_RAD21	RAD21	Cohesin	0.0	0.5356945538279784	inf	1.2509390304676443e-285	0.4903797724648721	282.5225526151631
GSE31477_ZNF143	ZNF143	Co-factors	3.317803403213604e-130	0.5199546820334331	127.09893811000242	2.0798660800151455e-07	0.4985629661677532	4.3017533861058475
GSE32465_PML	PML	Co-factors	2.7988201435149906e-21	0.5072377342356809	18.172813767356594	3.995462782315497e-103	0.5057373734615579	100.01822166871453
GSE32465_SRF	SRF	TF	6.763190959362186e-36	0.5104458485947245	32.789637108342504	0.0	0.5196925881933484	inf
GSE32465_CREB1	CREB1	TF	0.0314261642437026	0.4983260540247566	-0.8775026176559049	0.0012173082457775	0.4991382790312313	0.5343881944464527
GSE31477_CTCF	CTCF	Cohesin	6.878982353738931e-145	0.5223252486110044	141.78226456290824	8.645223895379536e-50	0.4956589815611274	46.68301251310544
GSE32465_BCLAF1	BCLAF1	TF	1.270086567410826e-10	0.5051725218765778	7.515955435389471	1.8621625830174135e-37	0.4965077257454694	34.34977116229568
GSE32465_FOXM1	FOXM1	TF	5.319781898581964e-57	0.512621910043927	53.89389493091515	3.647943301548139e-23	0.4973269374527648	20.05774067863644
GSE32465_YY1	YY1	TF	9.290262276448192e-27	0.5082457367983764	23.6517607834114	1.6107121955773324e-21	0.5025054299789821	18.412770811313518
GSE31477_BHLHE40	BHLHE40	TF	1.922254247773404e-35	0.5096418107099406	32.33597792901287	1.6194968079651132e-46	0.5037742832785235	43.410408661937566
GSE32465_RUNX3	RUNX3	TF	8.077416429091768e-78	0.4801820022996575	74.71251628489145	0.0	0.4820572031497699	inf
GSE32465_POU2F2	POU2F2	TF	0.0006226681137582	0.5027748447161239	0.8255321318048746	0.488041399677029	0.5001898371156256	-2.068667905699304
GSE31477_POLR2A	RPB1	Co-factors	1.2433039380729045e-71	0.5155075962749434	68.52521144904145	0.0	0.5330600092487957	inf
GSE32465_ATF3	ATF3	TF	2.536796323029269e-52	0.5234265179716431	49.21550315875898	4.195730911139103e-309	0.5218241589460908	305.996981130901
GSE33213_POLR2A	RPB1	Co-factors	0.0	0.5464930262861967	inf	0.0	0.5651837225227603	inf
GSE30226_POLR2A	RPB1	Co-factors	0.0	0.5457450399801362	inf	0.0	0.5635182374699094	inf
GSE31477_RFX5	RFX5	TF	9.988711580525376e-169	0.5340645065367817	165.6202792850328	0.0	0.5299001050172629	inf
GSE31477_SREBF2	SREBF2	TF	9.962567622949832e-63	0.5503860108931026	59.621417476012276	3.347901161110156e-298	0.5458035873504306	295.09501613029875
GSE19484_POLR2A	RPB1	Co-factors	4.778571537615753e-204	0.5317349084575652	200.94049066628844	0.0	0.5492184353069111	inf
GSE31477_CHD2	CHD2	Co-factors	1.0754238145622558e-77	0.515345703636849	74.58820910887144	0.0	0.5201329422312501	inf
GSE31477_NFYA	NFYA	TF	7.491672600193366e-27	0.5383270597386923	23.745209968634352	1.1418701109370192e-219	0.5462543365275923	216.5621720530752
GSE31477_NFYB	NFYB	TF	3.062584635588838e-11	0.5081628907755124	8.133700658871296	0.0	0.5278904529841197	inf
GSE30399_POLR2A	RPB1	Co-factors	0.0	0.5577840495880112	inf	0.0	0.5741618575979868	inf
GSE31477_SIN3A	SIN3A	Repressive	4.623146467003443e-254	0.5390427112502987	250.95485110564553	0.0	0.5499413233104539	inf
GSE31477_ELK1	ELK1	TF	6.169060723361289e-198	0.5391283196466398	194.8295697131715	0.0	0.5408666584247291	inf
GSE31477_MXI1	MXI1	TF	6.177420731100848e-115	0.5187104158835355	111.82898157706192	0.0	0.5180639212480211	inf
GSE31477_TBP	TBP	Co-factors	6.296642966430051e-171	0.524193214780226	167.820679689745	0.0	0.5235904556707892	inf
GSE53366_ZBTB33	ZBTB33	TF	8.49712628373963e-120	0.5365234383466978	116.69051668553095	0.0	0.5510439284471038	inf
GSE31477_JUND	JUND	TF	2.2407729084956172e-76	0.5215141522861921	73.26939091316994	0.0	0.5339589813613622	inf
GSE33213_MYC	MYC	TF	3.118541223003897e-177	0.5606769100595993	174.12583726906277	0.0	0.5803313168839771	inf
GSE31477_EP300	EP300	Co-factors	0.0098730413779922	0.4979907948811076	-0.37466219886096347	1.9956491908123083e-179	0.507592315988025	176.31970455795258
GSE31477_MAX	MAX	TF	1.4717528961115518e-110	0.519522945243921	107.45195385919979	0.0	0.5222892449357116	inf
GSE31477_E2F4	E2F4	TF	8.53561767072636e-146	0.5420870065241333	142.68855380445078	0.0	0.5414499935984954	inf
GSE32465_ATF2	ATF2	TF	0.1603719134068607	0.5011197479909937	-1.585339552539529	2.7337883915653093e-08	0.4984920238797827	5.183023863247588
GSE32465_TAF1	TAF1	Co-factors	3.892496544008473e-199	0.5315014026579177	196.0295605226407	0.0	0.5493445503440545	inf
GSE31477_USF2	USF2	TF	3.3502639780098706e-18	0.5097337832629311	15.094709730452648	0.0	0.5261399518441532	inf
GSE32465_STAT5A	STAT5A	TF	4.1338783459463616e-26	0.5080688100191044	23.003431066466792	3.526625269917684e-25	0.5027330756914907	22.07242944317803
GSE32465_NFATC1	NFATC1	TF	3.1703976573670138e-22	0.5110871816874647	19.11867501986592	0.0	0.5286865604581426	inf
GSE32465_ELF1	ELF1	TF	6.286455464264796e-11	0.4950328459173673	7.821382915101733	2.1205045321188704e-284	0.5096749834671598	281.29334955328136
GSE53366_CEBPA	CEBPA	TF	2.882825914873385e-68	0.5179947723726607	65.1599703408369	0.0	0.536423566537673	inf
GSE53366_REST	REST	Repressive	7.325962622330004e-18	0.5095771706430657	14.754924059760747	0.0	0.5279532610769216	inf
GSE31477_RCOR1	RCOR1	TF	1.087937619030016e-101	0.5183219542315713	98.5831847641098	0.0	0.5169180112965499	inf
GSE32465_REST	REST	Repressive	4.9345181892680995e-90	0.5248414443804583	86.926544004111	0.0	0.5372936239958176	inf
GSE31477_TBL1XR1	TBL1XR1	Co-factors	3.4954908736726805e-120	0.5190358283300618	117.07628058571517	0.0	0.5140945690570841	inf
GSE32465_ETS1	ETS1	TF	4.506786333260969e-92	0.5182135786789286	88.96592178963064	0.0	0.5245972599600657	inf
GSE32465_EGR1	EGR1	TF	5.202519240633747e-19	0.5077331922222326	15.903575063237385	0.0	0.5234902254161734	inf
GSE32465_IRF4	IRF4	TF	0.000895920418875	0.5025810985770731	0.6675193236021548	6.456831873823055e-37	0.5033572714153935	33.80976928010952
GSE32465_BCL3	BCL3	Co-factors	0.0513519546471661	0.4984455363463363	-1.0907682208293643	0.0	0.515972800609762	inf
GSE32465_TCF12	TCF12	TF	0.8253521278116382	0.5001703925220697	-2.296850516974858	0.0	0.5119761316710707	inf
GSE32465_MTA3	MTA3	TF	0.3497128843635785	0.4992664423807452	-1.9239228748928128	2.582044800609554e-37	0.4965714573810993	34.20782498492471
GSE19485_RELA	RELA	TF	2.88550033541651e-20	0.5101909586528247	17.159567629160424	0.0	0.5298717345296132	inf
GSE32465_MEF2A	MEF2A	TF	3.167557563841048e-17	0.5065177461278377	14.11906424225261	5.8567946394200784e-117	0.5061552168000281	113.85212876194188
GSE30399_MAX	MAX	TF	7.826805446297152e-44	0.5124815660706136	40.726204219747636	0.0	0.520262099338731	inf
GSE32465_NFIC	NFIC	TF	3.874930121018167e-13	0.4943460751505596	10.031524883273123	0.3490009596338245	0.4997500521695944	-1.923037862834401
GSE31477_EBF1	EBF1	TF	0.0046784497757658	0.5022833513701936	-0.050313213298322355	3.4899912632520527e-06	0.4987408765327007	3.0769644185286906
GSE32465_BATF	BATF	TF	8.090166511916385e-33	0.490498796030817	29.711831297929244	3.919713174711406e-13	0.5019549027254699	10.026534469634667
GSE53366_SPI1	SPI1	TF	1.7342330068842226e-52	0.4881548764784936	49.38068131058897	5.593413752308217e-28	0.502908092967322	24.872111812427303
GSE31477_SREBF1	SREBF1	TF	6.831388402979056e-122	0.541403426118494	118.78527978015967	0.0	0.5478715855280977	inf
GSE31477_CUX1	CUX1	TF	1.9910189121103618e-109	0.5283969438369499	106.32071337300425	0.0	0.533434967594926	inf
GSE30399_JUND	JUND	TF	1.8913757556950064e-57	0.5325750418201362	54.3430109404885	0.0	0.5409815399881327	inf
GSE31477_ZNF384	ZNF384	TF	5.050155193575883e-35	0.5119104599642151	31.91648403389686	0.0	0.5141793587414618	inf
GSE31477_IKZF1	IKZF1	TF	6.726065173244052e-17	0.509295835763925	13.792027687126142	0.0	0.5319747648325193	inf
GSE31477_NRF1	NRF1	TF	1.235353582848553e-40	0.5574507593628423	37.52799747915256	0.0	0.5751121423927688	inf
GSE32465_ZBTB33	ZBTB33	TF	3.680512377898299e-72	0.543480039571287	69.0538804756464	0.0	0.554199513233007	inf
